# Supplementary material
Source: MDPI journal article supplement (https://www.mdpi.com/2075-163X/3/1/94)
Supplement: s1 [file s1]

## Sheet: oxide wt%
EMP data - Eudialytes - 03/05/12 and 04/05/12 - recalculated
	Recalculated with new value of Bkg for Nb : Bg cnt (cps)= 2.5 (value of Pk cnt for #70)
	Mineral analyses with approximately 30% ZrO2 are catapleiite, not EGM.
	Oxide
DataSet/Point	Na2O	Al2O3	SiO2	Cl	K2O	CaO	TiO2	FeO	Y2O3	ZrO2	Nb2O5	Ce2O3	MnO	HfO2	La2O3	Nd2O3	Total	X	Y	Z
1 / 1 .	13.581	0.2766	47.1242	0.4566	0.4243	7.954	0.1034	2.9343	3.1992	11.8106	1.2088	1.1424	2.3093	0.3574	0.5403	0.5751	93.9976	-21413	1468	-6
2 / 1 .	13.8515	0.2418	46.7702	0.3812	0.6257	7.3834	0.1012	2.7893	3.0234	11.8581	1.1154	1.3828	2.297	0.4224	0.7215	0.6652	93.6301	-21321	792	-6
3 / 1 .	13.5557	0.2118	47.0916	0.3918	0.5931	8.0029	0.0858	2.8172	2.8672	11.4488	1.3023	1.3216	2.1975	0.394	0.6923	0.6734	93.6468	-20935	1271	-6
4 / 1 .	13.925	0.1824	47.1066	0.4003	0.5346	7.8925	0.0892	2.7582	2.8776	11.1158	1.3472	1.451	2.3936	0.3983	0.7151	0.8043	93.9915	-20535	1350	-6
5 / 1 .	13.4303	0.3746	47.7847	0.4369	0.2988	7.6403	0.1217	3.2881	2.8084	12.2629	0.375	0.9973	1.9161	0.3222	0.3837	0.6539	93.0947	-20100	725	-3
6 / 1 .	13.9274	0.3012	46.0787	0.5452	0.3934	7.1583	0.0648	2.1172	3.7306	11.6203	1.6146	1.2288	2.3292	0.3858	0.5901	0.5364	92.622	-19644	1342	-3
7 / 1 .	13.1501	-0.0024	43.5351	0.0071	0.0979	0.559	-0.0097	0.033	-0.0276	30.7772	0.0066	0.0402	0.0114	0.5954	0.0537	-0.0573	88.7694	-19469	601	.
8 / 1 .	13.5072	0.2619	47.5784	0.4217	0.4218	7.6781	0.1365	3.0182	2.9802	11.4778	0.7523	1.2136	2.0157	0.2557	0.5661	0.683	92.9681	-18604	1447	.
9 / 1 .	14.0606	0.3175	47.751	0.4094	0.5693	7.7881	0.1425	3.0737	3.1413	11.9108	0.5989	1.1481	1.9507	0.3669	0.4152	0.8134	94.4574	-17483	807	2
10 / 1 .	13.4506	0.2509	47.2129	0.4816	0.3495	7.2013	0.0664	3.1143	3.0851	12.0651	1.0871	1.4181	2.2863	0.3747	0.6741	0.8445	93.9624	-18118	-1142	5
11 / 1 .	13.7873	0.2425	47.5115	0.482	0.4153	7.2574	0.067	3.1658	2.8956	11.581	0.8584	1.3541	2.12	0.2933	0.5023	0.6694	93.203	-18676	-1002	5
12 / 1 .	14.1031	0.445	48.0415	0.4607	0.3781	6.4563	0.0382	3.0732	2.6481	13.7345	0.4673	1.0738	2.0139	0.3883	0.5656	0.5581	94.4457	-19330	-1618	5
13 / 1 .	13.6326	0.2345	46.8252	0.4832	0.3523	7.1831	0.0339	2.8327	2.9458	11.3815	1.2111	1.3501	2.3526	0.3724	0.6675	0.6859	92.5444	-19512	-961	1
14 / 1 .	14.204	0.3287	47.7033	0.4793	0.405	6.9149	0.0782	3.0504	3.0449	12.5635	0.5192	1.1687	1.9479	0.3661	0.4508	0.6986	93.9236	-20019	-1367	1
15 / 1 .	13.9107	0.3487	47.7812	0.4298	0.3417	7.2994	0.0848	3.1164	3.1944	12.0664	0.6135	1.2891	1.982	0.2329	0.4654	0.8269	93.9834	-20780	-1048	.
16 / 1 .	13.739	0.2611	47.4478	0.4962	0.4452	7.1601	0.0989	3.071	3.0101	11.9358	0.9151	1.3602	2.203	0.364	0.6135	0.6986	93.8197	-21024	-1766	1
17 / 1 .	13.8523	0.2274	47.1606	0.4556	0.4078	7.1007	0.0724	3.0925	3.0057	11.747	1.009	1.4219	2.2272	0.3447	0.6176	0.6373	93.3797	-21598	-1844	-1
18 / 1 .	13.8856	0.2619	47.1697	0.4727	0.3165	6.7714	0.1757	2.8406	3.2145	11.3094	0.8533	1.5864	2.2002	0.2548	0.4815	0.879	92.6732	-21328	-3173	-1
19 / 1 .	14.2091	0.364	47.8274	0.3471	0.4121	6.4227	0.0327	3.0981	2.348	13.3591	0.4886	1.7011	2.4242	0.3417	0.5684	1.1221	95.0664	-20678	-3787	4
20 / 1 .	13.984	0.2719	47.9739	0.4107	0.3518	6.7903	0.1271	3.0278	3.0389	11.7054	0.5565	1.7737	2.2425	0.2307	0.5979	1.0025	94.0856	-19991	-3419	5
21 / 1 .	13.8946	0.1911	46.695	0.4236	0.4298	6.93	0.0875	2.9067	2.8101	11.4372	1.2166	1.7874	2.6084	0.3534	0.8567	0.9419	93.5699	-19887	-2877	5
22 / 1 .	14.0382	0.2534	46.9949	0.3817	0.4962	6.6864	0.046	2.7792	2.917	11.6109	0.9232	1.8348	2.4197	0.3117	0.727	1.0468	93.4672	-19274	-3523	6
23 / 1 .	13.9371	0.1914	46.8145	0.4421	0.3358	6.7003	0.1605	2.7155	3.3918	11.538	0.9242	1.6432	2.4512	0.2697	0.8074	0.9504	93.273	-18772	-2887	6
24 / 1 .	13.8393	0.2299	47.0498	0.4255	0.4459	6.7831	0.1389	2.9235	3.0734	11.7132	0.9294	1.8484	2.637	0.3031	0.8004	1.1842	94.3249	-17962	-2643	9
25 / 1 .	13.6893	0.1994	46.9193	0.4737	0.3398	6.7697	0.1356	2.6413	3.1606	11.3224	0.9967	1.5097	2.4427	0.2916	0.6221	0.8797	92.3937	-17966	-3188	9
26 / 1 .	12.9585	0.2144	47.3388	0.4386	0.5771	6.6151	0.1332	2.658	2.8176	11.981	1.0286	1.9448	2.9679	0.2751	0.7368	1.0935	93.7791	-19905	-4958	9
27 / 1 .	13.4479	0.2979	47.8037	0.3868	0.5657	6.342	0.1434	2.7344	2.7698	12.3858	0.6414	1.6831	2.5265	0.2808	0.6374	1.0631	93.7095	-19814	-5681	9
28 / 1 .	12.954	0.2072	47.4232	0.536	0.6085	6.9502	0.1518	2.62	3.1708	11.4209	0.9737	1.5231	2.6808	0.303	0.7078	1.0696	93.3006	-19207	-5165	9
29 / 1 .	13.0591	0.2463	47.339	0.4341	0.6418	6.6433	0.1775	2.7374	2.9937	11.5676	0.5487	1.7824	2.379	0.1716	0.6136	0.9636	92.2988	-18966	-5952	8
30 / 1 .	13.213	0.2935	48.0966	0.4122	0.5623	6.3397	0.1286	3.0887	2.8872	12.0715	0.5629	1.384	2.6789	0.3139	0.5515	1.0876	93.6722	-19354	-6583	10
31 / 1 .	12.9426	0.2108	46.7741	0.4701	0.5606	6.6373	0.1128	2.5378	2.983	11.6757	0.9866	1.8122	2.8039	0.2837	0.7735	0.8887	92.4535	-18349	-6234	10
32 / 1 .	13.0958	0.2358	47.7529	0.4703	0.679	6.4777	0.1865	2.71	3.4213	11.2986	0.4777	1.599	2.676	0.2673	0.4652	1.1319	92.9451	-17754	-7050	13
33 / 1 .	12.9646	0.2529	48.0446	0.3877	0.5768	6.6605	0.188	2.8664	3.0499	11.6792	0.3687	1.6019	2.5374	0.2431	0.4359	0.938	92.7956	-18165	-7211	13
34 / 1 .	11.5712	0.1743	47.6259	0.3332	0.7721	6.3971	0.1355	1.6906	2.1956	11.2413	0.7701	2.1793	4.4908	0.3617	1.0493	1.1812	92.1693	-14996	-8689	19
35 / 1 .	11.475	0.1966	48.258	0.2929	0.786	6.5148	0.1487	2.0571	1.7387	11.8341	0.4381	2.2091	4.4175	0.1701	1.0794	1.267	92.8831	-14457	-9164	22
36 / 1 .	11.8785	0.2769	48.3413	0.2997	0.749	5.3714	0.1664	2.1134	1.7631	12.615	0.4596	2.424	4.3634	0.2628	1.045	1.2119	93.3414	-13840	-8766	23
37 / 1 .	10.9549	0.1301	47.8255	0.3402	0.9232	5.2953	0.1305	1.5998	2.1498	11.2264	0.9072	2.984	5.0744	0.2162	1.3891	1.1948	92.3414	-13714	-9418	23
38 / 1 .	11.9875	0.2405	48.0705	0.3202	0.6181	6.2228	0.1806	1.9023	2.0612	12.0224	0.3739	2.2874	4.4078	0.1546	1.023	1.1597	93.0324	-12996	-8894	27
39 / 1 .	11.3977	0.206	47.5783	0.3146	0.8249	5.9588	0.153	2.0127	1.9885	11.8559	0.5244	2.3772	4.4222	0.239	1.0671	0.9917	91.9121	-12349	-8915	26
40 / 1 .	12.2045	0.2128	47.5246	0.327	0.6243	6.169	0.1591	1.5471	2.2603	11.4463	0.6552	2.5136	4.4096	0.3133	1.1763	1.1829	92.7261	-11510	-9263	29
41 / 1 .	11.4694	0.162	47.9531	0.3338	0.8918	6.4464	0.1621	1.6486	2.3846	11.4862	0.7053	2.285	4.2787	0.2296	0.9625	1.1451	92.5442	-11530	-8534	30
42 / 1 .	11.5367	0.1973	47.5826	0.3443	0.8345	6.2581	0.1584	1.6403	2.5671	11.4938	0.5907	2.293	4.1257	0.3035	1.0444	1.0342	92.0046	-10830	-8583	32
43 / 1 .	11.8329	0.2353	48.0538	0.3076	0.8063	6.1294	0.1785	1.9118	2.1661	11.7814	0.4317	2.3334	4.4039	0.1971	1.0285	1.0939	92.8917	-10839	-8914	32
44 / 1 .	10.3164	0.2924	48.4634	0.3326	0.9966	7.429	0.0808	2.921	2.8984	11.97	0.5554	1.1614	2.0355	0.3174	0.4683	0.5891	90.8275	-13560	-6472	25
45 / 1 .	10.558	0.274	48.0642	0.3471	0.8265	7.5364	0.1133	2.8295	2.8165	11.5477	0.9584	1.3277	2.2626	0.2834	0.6192	0.7142	91.0786	-14329	-6462	21
46 / 1 .	9.5051	0.099	48.0441	0.2839	1.161	7.9446	0.1121	2.7366	2.6518	11.6791	0.9558	1.4225	2.3883	0.2811	0.8581	0.7496	90.8726	-14933	-6470	21
47 / 1 .	9.7639	0.2666	48.6013	0.3467	1.0127	7.3322	0.0869	2.8476	2.9655	12.047	0.6921	1.2696	2.1296	0.2999	0.4979	0.5735	90.7331	-15032	-5875	21
48 / 1 .	9.1571	0.2915	48.47	0.3247	1.0298	8.1564	0.0928	2.9762	2.8443	11.6785	0.5119	1.1866	2.0032	0.3084	0.4192	0.5935	90.0443	-14136	-5798	22
49 / 1 .	10.0092	0.2118	47.6568	0.2596	0.9564	7.8531	0.1065	2.8385	2.5934	11.6174	0.8628	1.4795	2.5972	0.3166	0.7003	0.6862	90.7453	-15284	-5044	17
50 / 1 .	9.123	0.1078	47.9977	0.3056	1.2837	7.5537	0.1229	2.4823	2.9322	11.8102	0.8566	1.489	2.2498	0.3303	0.715	0.5218	89.8815	-14361	-5037	20
51 / 1 .	9.7076	0.253	48.0203	0.3462	1.0269	7.4987	0.1235	2.9247	2.9073	11.6552	0.6847	1.2403	2.232	0.2401	0.5223	0.5888	89.9715	-14242	-4509	19
52 / 1 .	9.9218	0.2333	48.3372	0.3427	0.907	7.5348	0.112	2.9405	2.8917	11.6454	0.9139	1.4123	2.3212	0.3172	0.6053	0.7518	91.1882	-13265	-4941	23
53 / 1 .	12.9293	0.2429	47.3448	0.4453	0.4501	7.1097	0.0943	3.1858	2.7316	12.0992	0.6698	1.3075	2.3256	0.3771	0.6034	0.7541	92.6705	-11552	-4406	30
54 / 1 .	13.4869	0.3458	48.0821	0.3885	0.4381	6.8284	0.1085	3.1637	2.7199	12.6579	0.3245	1.341	2.0132	0.3468	0.5423	0.7958	93.5836	-10287	-4250	33
55 / 1 .	13.0213	0.3143	47.664	0.4473	0.4222	7.6549	0.0782	3.4341	2.8746	11.5972	0.4979	1.3386	2.0518	0.2128	0.4897	0.7027	92.8016	-9672	-3875	33
56 / 1 .	13.328	0.4065	47.3447	0.3269	0.4487	6.5669	0.0318	3.1142	2.5428	13.3535	0.4171	1.3408	1.9755	0.3497	0.4889	0.9623	92.9985	-9559	-3446	33
57 / 1 .	13.552	0.3584	47.2972	0.2943	0.5251	6.3267	0.045	3.2378	2.6446	13.3366	0.5106	1.3382	2.0389	0.3697	0.5832	0.8227	93.2812	-10046	-4888	33
58 / 1 .	13.5866	0.378	47.5198	0.4318	0.438	6.8053	0.1012	3.286	2.5673	12.7181	0.3098	1.2226	1.991	0.327	0.3316	0.8205	92.8344	-10033	-5215	34
59 / 1 .	13.6562	0.3531	47.9452	0.2587	0.4871	6.1972	0.0365	3.2556	2.5066	13.7369	0.295	1.3032	1.9022	0.2836	0.5782	0.7951	93.5904	-10883	-5050	34
60 / 1 .	13.3661	0.2655	47.5522	0.4101	0.7018	7.2849	0.0658	3.2901	2.5864	12.2021	1.0419	1.4907	2.2666	0.3465	0.6673	0.8198	94.358	-10905	-5918	34
61 / 1 .	13.2107	0.1971	46.9783	0.4346	0.4184	7.4161	0.0621	3.2082	2.7705	11.2306	1.2535	1.3786	2.2786	0.3706	0.7242	0.7814	92.7136	-10565	-6571	34
62 / 1 .	12.8374	0.2668	47.5935	0.3899	0.4055	7.3647	0.1017	3.3037	2.7116	11.7105	0.6849	1.5125	2.2286	0.3071	0.6015	0.7594	92.7795	-9497	-5384	36
63 / 1 .	7.9975	-0.0081	43.0302	0.0116	0.1008	6.7584	-0.006	0.0098	-0.095	29.8205	-0.0137	0.0466	0.0219	0.6726	-0.0102	0.1044	88.4413	-9369	-5849	40
64 / 1 .	13.289	0.1397	49.9323	0.423	0.2564	10.4843	0.1015	5.5678	0.4474	11.4041	0.0217	0.2832	1.4889	0.2037	-0.0117	0.149	94.1804	-8383	-6996	40
65 / 1 .	13.253	0.1277	50.8035	0.4313	0.2375	10.4749	0.1119	5.5047	0.4555	11.6552	0.058	0.1653	1.4151	0.1688	-0.0114	0.0058	94.8568	-7266	-6767	46
66 / 1 .	12.7949	0.1012	49.4564	0.336	0.5427	10.547	0.1181	5.398	0.4717	11.8206	0.2671	0.276	1.6469	0.2513	0.2206	0.0203	94.2689	-6979	-5772	46
67 / 1 .	13.3756	0.1427	50.0983	0.4342	0.2587	10.5806	0.1013	5.5706	0.4172	11.4359	0.0724	0.2108	1.3757	0.2157	0.0011	0.1261	94.4169	-6625	-5929	46
68 / 1 .	12.8065	0.1453	49.7399	0.4188	0.2551	10.5084	0.1561	5.4874	0.4802	11.5867	0.0215	0.3269	1.4587	0.2244	0.0709	0.1374	93.8242	-6444	-5234	45
69 / 1 .	13.0444	0.1294	49.8347	0.4558	0.3863	10.3973	0.1781	5.4696	0.4999	11.9145	-0.043	0.1628	1.4525	0.2152	0.1233	0.0049	94.2257	-5726	-4369	47
70 / 1 .	12.8086	0.1404	50.1113	0.4685	0.2546	10.6986	0.1441	5.55	0.4628	12.0271	0	0.2105	1.4414	0.1919	0.112	0.0654	94.6872	-6131	-3898	47
71 / 1 .	13.0221	0.148	50.16	0.453	0.3963	10.5231	0.1446	5.5798	0.3456	11.9582	0.0716	0.2339	1.4879	0.1946	0.065	0.0564	94.8399	-6462	-3594	45
72 / 1 .	10.5815	0.2414	47.9421	0.3581	0.9073	7.0171	0.1063	2.3261	2.7959	11.9866	1.0359	1.6988	2.9637	0.3167	0.7883	0.8297	91.8957	-5273	-2228	45
73 / 1 .	8.4043	0.2562	48.0882	0.4098	1.1477	7.653	0.1314	2.3081	3.0659	11.7115	0.562	1.5863	2.4922	0.2517	0.6881	0.6751	89.4313	-6213	-2127	42
74 / 1 .	9.6098	0.2752	48.4681	0.3829	0.9235	7.6148	0.1359	2.7033	2.9402	11.6392	0.3465	1.1843	2.5275	0.2584	0.4967	0.8605	90.3669	-5951	-1693	40
75 / 1 .	8.326	0.2401	48.4218	0.3928	1.1932	7.3861	0.1634	2.2454	3.272	11.9117	0.5841	1.3032	2.4949	0.2405	0.4768	0.7972	89.449	-7060	-1772	38
76 / 1 .	10.2328	0.2498	47.4586	0.3165	0.932	7.3573	0.1116	2.1596	3.2317	11.5646	0.9946	1.596	2.7706	0.3093	0.7265	0.9045	90.9158	-7484	-2494	38
77 / 1 .	8.9387	0.2752	48.2493	0.3444	0.92	7.6448	0.1749	2.5098	3.0816	11.3568	0.5487	1.5109	2.5275	0.197	0.603	0.7645	89.6473	-7634	-1541	34
78 / 1 .	9.0475	0.2604	48.734	0.3799	0.9973	7.9444	0.0969	2.8085	2.8587	11.3687	0.4546	1.2866	2.5304	0.2159	0.4959	0.7926	90.2724	-8495	-2261	35
79 / 1 .	9.2151	0.2902	48.2231	0.3582	1.4215	7.0965	0.1727	2.4014	3.0489	11.8991	0.4756	1.3627	2.6251	0.2275	0.6356	0.8442	90.2973	-9002	-1914	35
80 / 1 .	11.8193	0.3218	48.1384	0.4409	0.3677	7.4527	0.0588	2.8011	2.9681	12.3313	0.5483	1.2344	2.2002	0.3518	0.5254	0.7115	92.2717	-11678	-2299	27
81 / 1 .	13.1895	0.3241	48.025	0.4592	0.5895	7.3327	0.0573	2.5369	3.0382	12.6345	0.6484	1.1322	2.321	0.3706	0.5499	0.7791	93.9881	-12452	-2626	27
82 / 1 .	11.1753	0.3147	48.3072	0.5107	0.3638	7.1772	0.0389	2.7801	2.8898	12.4216	0.5266	1.0433	2.2846	0.3302	0.3906	0.6509	91.2055	-12437	-2160	23
83 / 1 .	11.3761	0.2359	47.3826	0.2775	0.3401	7.742	0.0722	2.4757	3.0014	11.4778	0.8805	1.5355	2.4513	0.3377	0.6614	0.7576	91.0055	-13199	-2742	20
84 / 1 .	11.7168	0.2487	47.9697	0.368	0.544	7.765	0.1222	2.4157	3.3665	11.6469	0.8089	1.168	2.5025	0.3478	0.5125	0.6105	92.1138	-13516	-3212	22
85 / 1 .	11.6675	0.2551	47.8841	0.4104	0.3884	7.9616	0.1153	2.519	3.1408	11.8359	0.9015	1.1792	2.4136	0.3697	0.5332	0.7589	92.3342	-14108	-2861	18
86 / 1 .	11.8145	0.3336	47.9414	0.4953	0.4985	7.3511	0.061	2.6298	2.8471	12.034	0.678	1.2302	2.2396	0.3188	0.5857	0.7566	91.8152	-13546	-2609	19
87 / 1 .	12.1934	0.2278	47.932	0.4827	0.4098	7.9524	0.0791	2.506	3.1801	11.611	0.9449	1.2693	2.4904	0.3484	0.6267	0.6468	92.9007	-15330	-2570	15
88 / 1 .	12.4675	0.2036	46.8364	0.4173	0.5261	7.5984	0.1082	2.706	2.8297	11.1488	1.1383	1.659	2.4259	0.3269	0.8548	0.9185	92.1654	-15282	-460	9
89 / 1 .	12.7767	0.2551	47.745	0.377	0.4741	7.4547	0.1409	2.5677	3.1405	11.8472	0.6282	1.4093	2.1689	0.27	0.6164	0.7668	92.6386	-14563	-349	13
90 / 1 .	12.8796	0.2339	47.165	0.394	0.5063	7.3781	0.1215	2.5522	3.0571	11.5822	0.8442	1.5002	2.2793	0.2945	0.6649	0.8237	92.2767	-14499	-1021	15
91 / 1 .	12.3678	0.3013	47.7163	0.4048	0.5196	7.3322	0.1207	2.778	2.7597	12.4324	0.7915	1.4707	2.1722	0.3309	0.6533	0.7078	92.8594	-13555	-443	17
92 / 1 .	12.8134	0.2265	47.3456	0.4128	0.5335	7.5159	0.1526	2.5934	3.2252	11.4805	0.9819	1.2599	2.0957	0.2836	0.5029	0.8142	92.2378	-13219	-40	17
93 / 1 .	12.8885	0.3481	48.1276	0.4034	0.5157	7.4819	0.1507	3.0507	2.6449	12.1282	0.1371	1.2819	1.9255	0.2419	0.4575	0.8603	92.6439	-13024	-518	16
94 / 1 .	10.1947	0.25	47.182	0.4001	0.4971	7.3962	0.1463	2.5718	3.2602	12.24	0.6843	1.4369	2.2601	0.2932	0.6267	0.6996	90.1393	-12232	-391	21
95 / 1 .	12.6768	0.248	47.8237	0.3902	0.4423	7.5226	0.135	2.8345	2.82	11.432	0.751	1.4225	2.2126	0.2864	0.5729	0.8595	92.4301	-11751	-289	21
96 / 1 .	14.0064	0.3952	47.9577	0.5979	0.3646	7.5209	0.0602	3.3399	2.6513	11.7589	0.6406	0.9722	1.9486	0.3795	0.6042	0.5692	93.7674	-8927	194	27
97 / 1 .	14.1655	0.3177	47.8324	0.6194	0.6956	7.5875	0.0593	3.3276	2.72	11.7935	0.8434	1.1192	2.0043	0.3958	0.5373	0.6609	94.6795	-8395	-52	28
98 / 1 .	13.8462	0.2774	47.4514	0.5941	0.3871	7.4645	0.0406	3.3003	2.7271	11.7641	0.5538	1.0805	1.9063	0.3886	0.5227	0.5579	92.8625	-7914	567	28
99 / 1 .	14.0372	0.355	47.8019	0.6441	0.5615	7.2671	0.059	3.2658	2.4261	12.6946	0.3488	1.0056	1.7689	0.3797	0.452	0.4617	93.5288	-7270	15	32
100 / 1 .	14.0142	0.3401	48.6495	0.5484	0.4018	7.6344	0.0763	3.6656	1.9742	12.5069	0.1455	0.8861	1.8118	0.3743	0.3548	0.5487	93.9324	-6404	682	32
101 / 1 .	14.2501	0.3695	47.8049	0.6	0.3802	7.4599	0.0523	3.595	2.2733	12.2852	0.4148	0.8396	1.6643	0.371	0.3005	0.5288	93.1894	-6308	60	33
102 / 1 .	13.1815	0.3168	48.9527	0.5269	0.3709	7.8149	0.0698	3.8069	1.7707	12.53	0.2907	0.8454	1.7746	0.3351	0.3321	0.4778	93.3968	-5900	768	33
103 / 1 .	13.5454	0.2396	48.684	0.5988	0.4003	8.6696	0.0771	4.0729	1.7683	11.421	0.4651	0.9697	1.8933	0.1891	0.4355	0.6066	94.0362	-4931	277	38
104 / 1 .	11.1279	0.1925	48.4109	0.4122	0.5947	5.1863	0.1841	0.9058	2.2729	11.4902	0.4808	2.794	5.3619	0.2824	1.2822	1.3128	92.2916	-5140	2576	31
105 / 1 .	11.2697	0.2395	48.3639	0.3443	0.6907	4.743	0.1554	1.0919	2.1241	12.0109	0.3788	2.9574	4.906	0.3789	1.1017	1.2987	92.0547	-5646	3008	29
106 / 1 .	11.2892	0.2319	47.9709	0.3767	0.6952	4.8029	0.195	1.1056	2.4572	11.591	0.3574	2.8268	5.1751	0.4016	1.1396	1.2294	91.8457	-5841	2301	29
107 / 1 .
108 / 1 .	5.1035	0.0139	42.9264	0.012	0.3829	7.5811	0.0231	-0.0052	-0.0058	30.2735	0.0819	-0.0183	0.0952	0.6803	-0.0231	0.042	87.1634	-6711	2768	29
109 / 1 .	14.5011	22.7749	46.8377	0.0102	0.0767	1.0054	0.0017	0.3258	0.2475	3.4577	0.1396	0.1694	0.1363	0.0578	0.0798	0.0365	89.8583	-6910	2163	29
110 / 1 .	8.7651	0.1261	48.601	0.2423	0.9871	6.6988	0.1865	0.9197	2.9334	11.3406	0.6932	2.184	3.5463	0.3841	1.2966	1.1941	90.0988	-8118	5810	11
111 / 1 .	8.5742	0.1635	48.7984	0.2606	1.0214	6.7947	0.2209	1.0573	3.4205	11.4732	0.1171	2.0927	3.1058	0.2602	0.7829	1.2661	89.4092	-7592	6363	9
112 / 1 .	7.0133	-0.0026	42.9771	0.0066	0.0902	6.7589	-0.0001	0.0184	-0.0767	29.174	-0.0206	0.1414	-0.032	0.7952	0.0582	0.0389	86.9402	-7333	6137	10
113 / 1 .	8.5269	0.1246	48.176	0.2916	1.0551	6.7869	0.2036	0.8343	3.4177	11.2163	0.4389	2.1361	3.1012	0.3195	0.8764	1.0649	88.5697	-6986	5786	12
114 / 1 .
115 / 1 .	8.6859	0.1264	49.0046	0.2533	0.9849	6.39	0.1944	0.9749	3.2408	11.5581	0.4389	2.3256	3.3196	0.4066	0.7709	1.2158	89.8909	-8543	6562	8
116 / 1 .
117 / 1 .	8.6263	0.1515	48.981	0.1875	0.9709	6.4711	0.2515	1.1686	3.0851	11.3615	0.1903	2.1724	3.3354	0.2957	0.8297	1.0199	89.0986	-9333	5541	9
118 / 1 .	8.1668	0.1571	49.3599	0.1679	0.8777	6.9572	0.2712	1.6165	1.5102	11.5148	0.1818	2.5895	4.1017	0.2776	0.9035	1.3113	89.9648	-10286	6280	2
119 / 1 .	12.1976	0.2778	48.1932	0.3686	0.2937	6.7595	0.1007	2.7268	2.9648	11.5552	0.6357	1.6146	2.5547	0.2779	0.6253	0.8094	91.9555	-11254	8157	-6
120 / 1 .	12.0883	0.2243	47.3011	0.3381	0.3483	6.7869	0.0617	2.4193	3.037	11.1965	0.8765	1.5908	2.7957	0.3546	0.7572	0.9738	91.1501	-12054	8392	-11
121 / 1 .	12.5378	0.2446	47.7721	0.3701	0.3156	6.8331	0.091	2.519	3.1122	11.5085	0.9127	1.5327	2.6694	0.3212	0.715	0.8731	92.328	-12777	8397	-11
122 / 1 .	12.2099	0.2046	47.8955	0.3232	0.3161	7.153	0.1235	2.4992	2.9655	11.2035	0.9635	1.8166	2.7438	0.3134	0.857	0.8579	92.446	-13880	7872	-11
123 / 1 .	11.7307	0.2882	48.1524	0.3593	0.6798	6.4925	0.1308	2.5276	2.7367	11.8701	0.6057	1.4585	2.4265	0.3604	0.5557	0.7819	91.1567	-13734	8669	-15
124 / 1 .	13.3349	0.3657	48.234	0.3527	0.357	6.0929	0.0543	2.5885	2.5931	13.1888	0.7351	1.1153	2.3227	0.3821	0.5767	0.6235	92.9174	-14693	8439	-15
125 / 1 .	12.8676	0.1727	47.7187	0.3794	0.3557	6.7349	0.1035	2.3722	3.1062	11.4578	0.9852	1.81	2.8169	0.3523	0.7628	0.911	92.9069	-15165	8139	-15
126 / 1 .	12.2264	0.1638	47.2696	0.3978	0.3256	6.9071	0.0906	2.4612	3.0339	11.2044	1.0869	1.7696	2.8473	0.3015	0.9173	0.8846	91.8874	-15466	7247	-15
127 / 1 .	12.9182	0.2037	47.558	0.3849	0.2944	6.6845	0.058	2.5589	2.9679	11.462	0.9561	1.4862	2.8116	0.2763	0.6896	0.7779	92.0881	-15905	8037	-15
128 / 1 .	12.2428	0.2237	47.6724	0.2514	0.7263	6.6318	0.0586	3.1312	2.405	11.1224	0.4524	2.0492	2.5907	0.1393	0.7583	1.2132	91.6685	-18716	6048	-14
129 / 1 .	12.2651	0.1932	48.3645	0.2114	0.7443	6.2458	0.0707	3.162	2.3304	11.3809	0.5181	2.3095	2.6595	0.2376	0.8445	1.2213	92.7588	-19195	5425	-10
130 / 1 .	12.8279	0.3416	47.9911	0.262	0.6958	5.9235	0.0284	3.1952	2.1081	12.7636	0.3854	1.9384	2.5672	0.3022	0.6977	1.2113	93.2394	-18303	4932	-7
131 / 1 .	12.5385	0.2141	48.017	0.2229	0.7606	5.7294	0.0231	3.1305	2.1111	12.8336	0.6246	2.2267	2.6853	0.3026	0.8188	1.0154	93.2542	-17608	4226	-4
132 / 1 .	13.1848	0.3402	47.6554	0.3465	0.672	5.7227	0.0594	3.0035	2.3291	12.7574	0.4294	1.6607	2.3892	0.3254	0.624	0.9849	92.4846	-19276	4832	-10
133 / 1 .	12.7159	0.2224	48.4072	0.2135	0.7583	6.4587	0.0593	3.2201	2.1449	11.2768	0.3722	2.0902	2.6686	0.2317	0.7742	1.2127	92.8267	-19678	4754	-10
134 / 1 .	12.3468	0.2256	48.361	0.2245	0.7077	6.4775	0.0651	3.1392	2.2689	11.4064	0.5541	2.5092	2.8248	0.1997	0.8266	1.5355	93.6724	-20435	4153	-10
135 / 1 .	12.4593	0.2316	48.0824	0.2066	0.7577	6.3381	0.0658	3.0848	2.2645	11.5605	0.4594	2.3122	2.5773	0.1876	0.7391	1.3492	92.6762	-19697	3756	-8
136 / 1 .	11.8794	0.2676	47.6165	0.2899	0.7851	6.6061	0.0846	3.0072	2.4308	11.4968	0.4955	1.9021	2.7661	0.1959	0.7355	1.186	91.7451	-18751	3568	-6
137 / 1 .	13.0289	0.2747	47.8073	0.3946	0.5889	6.5724	0.035	3.0081	2.678	11.3657	0.5111	1.8448	2.6223	0.3078	0.743	1.1747	92.9572	-19033	3890	-8
138 / 1 .	8.5593	0.1687	49.208	0.1593	1.0251	7.0169	0.2386	1.3348	1.6612	11.4352	0.4506	2.9466	4.0098	0.3219	1.3808	0.9873	90.9041	-14987	5756	-5
139 / 1 .	8.9857	0.1284	48.9046	0.2167	0.9512	6.7456	0.2325	1.2965	1.8699	11.6047	0.3129	2.7097	3.9845	0.4785	1.2955	0.9687	90.6855	-14553	5895	-4
140 / 1 .	8.5164	0.1374	49.3609	0.2158	1.2174	6.5844	0.2443	1.2104	2.3152	11.3333	0.3354	2.5644	3.8102	0.3194	1.2474	0.8791	90.2915	-14347	5927	-4
141 / 1 .	8.3684	0.1315	48.708	0.2249	1.2598	6.5655	0.2338	1.1457	2.4868	11.4454	0.1677	2.3888	3.4026	0.2138	1.2728	1.0106	89.0261	-13921	5960	-4
142 / 1 .	8.927	0.1238	48.8114	0.2194	0.9523	6.7748	0.2259	1.3424	1.6467	11.475	0.5305	2.7619	4.1738	0.3826	1.3598	1.0535	90.7608	-13544	5815	-1
143 / 1 .
144 / 1 .
145 / 1 .
146 / 1 .	5.9627	0.0979	43.4336	0.0177	0.2356	8.5482	0.0064	0.2084	0.1122	28.0337	0.1375	0.2187	0.2941	0.7804	0.1064	0.1122	88.3058	-13210	5578	1
147 / 1 .	8.9835	0.09	48.468	0.2018	0.9051	7.2432	0.1804	1.2438	1.6383	11.4925	1.0141	2.6767	4.345	0.3459	1.7153	0.9271	91.4707	-13590	5533	.
148 / 1 .	12.4699	0.2538	48.1362	0.2384	0.672	6.7182	0.0509	3.1028	2.2512	11.6971	0.4807	2.1816	2.7243	0.1914	0.8998	1.3797	93.4481	-14231	5439	.
149 / 1 .	9.1958	0.1953	48.9079	0.1607	0.9132	5.9575	0.2152	1.498	1.68	12.6385	0.6165	2.3789	3.9413	0.4101	1.5312	1.128	91.3682	-14066	5007	1
150 / 1 .
151 / 1 .	9.248	0.1216	48.0976	0.2162	0.9888	6.5035	0.2021	1.2548	2.1466	11.0601	0.8222	2.5596	4.167	0.3301	1.4573	1.0997	90.2752	-13366	4291	2
152 / 1 .
153 / 1 .	12.7936	0.3537	48.1332	0.538	0.6201	6.3451	0.1566	2.4	2.6075	13.2876	0.2983	1.1063	2.1897	0.3394	0.4529	0.6375	92.2595	-11872	2176	12
154 / 1 .	8.4881	0.0132	43.2177	0.0109	0.0772	5.3099	-0.0031	0.0859	0.1364	29.9676	-0.0275	0.0759	0.0432	0.6503	0.0151	-0.0923	87.9684	-12288	2030	13
155 / 1 .	11.4859	0.0066	43.4688	0.0125	0.0831	2.6598	-0.0043	0.0495	-0.0217	29.8981	0.0485	0.0254	0.0304	0.734	0.0171	0.0025	88.4962	-12768	1996	12
156 / 1 .	11.6006	0.1595	47.2611	0.7425	0.5816	7.7446	0.1595	2.2375	3.0886	11.0106	1.0271	1.4093	2.8115	0.322	0.5297	0.737	91.4225	-13190	1956	10
157 / 1 .	12.2989	0.2426	47.9197	0.7324	0.6429	7.9427	0.2721	1.9244	3.9166	11.0367	0.403	1.0225	1.9419	0.2624	0.1331	0.7209	91.4129	-13720	1910	10
158 / 1 .	9.4498	0.003	43.4551	0.0074	0.0682	4.2685	0.0084	0.1129	-0.0382	30.1824	0.0069	0.017	0.0412	0.7279	-0.0206	0.005	88.2948	-14552	1835	6
159 / 1 .	11.6798	0.013	43.3166	-0.0008	0.1097	2.9161	0.005	0.0733	-0.0249	30.1862	0.083	-0.1207	0.016	0.7545	-0.1069	0.0046	88.9045	-15244	2040	6
160 / 1 .	9.1275	0.0004	43.0202	0.007	0.0669	4.9433	-0.0071	0.3005	-0.0459	29.8822	0.0482	-0.0106	-0.0117	0.6765	0.0658	-0.0538	88.0094	-15644	2143	2
161 / 1 .	13.1459	0.1973	47.5289	0.7449	0.4794	7.6347	0.2144	2.3605	3.0925	11.0485	0.8316	1.2672	2.6843	0.2807	0.4591	0.7301	92.6999	-15682	1727	4

## Sheet: all data
EMP data - Eudialytes - 03/05/12 and 04/05/12 - recalculated
	Recalculated with new value of Bkg for Nb : Bg cnt (cps)= 2.5 (value of Pk cnt for #70)
	Results
	Peak cnt (cps)	Peak (cts)	Ix (c/s/nA)	Pk-Bg (cps)	Bg cnt (cps)	Bg1 cnt (cps)	Bg2 cnt (cps)	Ix/Istd	Weight%	Norm Weight%	Atomic%	Det.Lim ppm	StdDev wt%
	1 / 1 . X = -21413. Y = 1468. Z = -6.
Na	2330.89	23131	149.567	2266.29	64.5984	63.6134	65.214	1.0665	10.0751	10.7185	11.1966	577	0.3864
Al	163.788	3274	5.9066	89.4987	74.2898	80.7215	65.7143	0.0024	0.1464	0.1557	0.1386	161	0.017
Si	7664.58	74755	501.786	7603.27	61.3135	79.821	42.8061	0.8855	22.0271	23.4337	20.0376	366	0.291
Cl	67.465	1349	4.0861	61.9149	5.5501	5.2001	5.9001	0.1077	0.4566	0.4857	0.329	200	0.0478
K	122.049	1220	6.8556	103.878	18.1711	18.8012	17.401	0.027	0.3522	0.3747	0.2302	234	0.0381
Ca	517.282	5164	33.5314	508.081	9.2003	7.8002	10.6004	0.1643	5.6847	6.0477	3.6237	552	0.2554
Ti	82.9727	1659	1.7574	26.6287	56.344	63.1131	48.6078	0.0017	0.062	0.0659	0.0331	199	0.0184
Fe	204.888	4095	12.4538	188.705	16.1832	17.401	15.1008	0.0194	2.2809	2.4265	1.0435	556	0.1228
Y	665.056	13272	37.4743	567.825	97.2314	87.7254	104.836	0.039	2.5192	2.6801	0.7239	499	0.0904
Zr	824.186	16439	52.0281	788.351	35.8351	39.1051	30.6031	0.1555	8.7434	9.3018	2.4489	758	0.2347
Nb	10.9004	218	0.5544	8.4004	2.5	2.8	3.8	0.0058	0.845	0.899	0.2324	1843	0.2478
Ce	44.1564	883	1.7526	26.5554	17.601	19.2012	16.6009	0.0139	0.9754	1.0377	0.1778	1761	0.1954
Mn	146.771	2934	8.8771	134.509	12.262	11.8005	13.0006	0.0467	1.7885	1.9027	0.8317	533	0.1185
Hf	134.56	2690	2.9026	43.9821	90.5777	103.836	77.3197	0.0021	0.303	0.3224	0.0434	748	0.0696
La	29.8029	596	0.8548	12.952	16.8509	17.9011	16.1009	0.0066	0.4607	0.4901	0.0847	1669	0.1631
Nd	18.3011	549	0.5085	7.7052	10.5959	10.067	11.2004	0.0068	0.4931	0.5245	0.0873	1944	0.189
O									36.7844	39.1334	58.7377
Total									93.9976	100	100
Formula	Oxide
Na2O	13.581
Al2O3	0.2766
SiO2	47.1242
Cl	0.4566
K2O	0.4243
CaO	7.954
TiO2	0.1034
FeO	2.9343
Y2O3	3.1992
ZrO2	11.8106
Nb2O5	1.2088
Ce2O3	1.1424
MnO	2.3093
HfO2	0.3574
La2O3	0.5403
Nd2O3	0.5751
Total	93.9976
	2 / 1 . X = -21321. Y = 792. Z = -6.
Na	2386.95	23683	152.494	2310.43	76.527	78.6204	75.2187	1.0874	10.2757	10.9748	11.4879	628	0.3935
Al	148.923	2977	5.1439	77.9349	70.9882	77.4198	62.4129	0.0021	0.1279	0.1367	0.1219	158	0.0163
Si	7577.98	73931	496.345	7520.07	57.9115	69.616	46.2071	0.8759	21.8616	23.349	20.0062	357	0.2899
Cl	58.9615	1179	3.4131	51.7113	7.2502	6.9002	7.6002	0.0899	0.3812	0.4072	0.2764	228	0.0443
K	169.294	1692	10.1165	153.274	16.0209	16.2009	15.8008	0.0398	0.5194	0.5548	0.3415	220	0.0438
Ca	482.567	4818	31.1511	471.967	10.6004	11.6004	9.6003	0.1527	5.2769	5.6359	3.3839	591	0.2461
Ti	81.672	1633	1.7245	26.1284	55.5437	61.6125	48.6078	0.0017	0.0607	0.0648	0.0326	197	0.0183
Fe	196.277	3923	11.8513	179.559	16.7186	18.2011	15.4008	0.0185	2.1681	2.3156	0.9978	564	0.1203
Y	632.568	12625	35.3681	535.859	96.7087	91.9279	100.533	0.0368	2.3808	2.5427	0.6883	498	0.088
Zr	823.281	16421	52.1721	790.454	32.8267	35.9043	27.9026	0.1559	8.7786	9.3758	2.4734	726	0.2347
Nb	10.2504	205	0.5115	7.7503	2.5	3.3	4.0001	0.0054	0.7797	0.8327	0.2157	1843	0.2417
Ce	51.1086	1022	2.1243	32.1844	18.9243	17.201	20.0013	0.0168	1.1806	1.2609	0.2166	1823	0.2083
Mn	146.421	2927	8.8396	133.928	12.4928	12.3005	12.8005	0.0465	1.7789	1.8999	0.8322	537	0.1183
Hf	135.06	2700	3.4214	51.8369	83.2233	94.2293	72.2172	0.0025	0.3582	0.3826	0.0516	719	0.0688
La	33.1536	663	1.1431	17.3195	15.8342	17.001	15.0007	0.0088	0.6152	0.657	0.1138	1616	0.167
Nd	20.2347	607	0.589	8.9232	11.3115	11.9338	10.6004	0.0079	0.5703	0.6091	0.1016	2006	0.1974
O									36.5162	39.0005	58.6587
Total									93.6301	100	100
Formula	Oxide
Na2O	13.8515
Al2O3	0.2418
SiO2	46.7702
Cl	0.3812
K2O	0.6257
CaO	7.3834
TiO2	0.1012
FeO	2.7893
Y2O3	3.0234
ZrO2	11.8581
Nb2O5	1.1154
Ce2O3	1.3828
MnO	2.297
HfO2	0.4224
La2O3	0.7215
Nd2O3	0.6652
Total	93.6301
	3 / 1 . X = -20935. Y = 1271. Z = -6.
Na	2328.35	23106	148.958	2256.84	71.5092	67.8152	73.818	1.0622	10.0563	10.7385	11.2171	608	0.3863
Al	139.714	2793	4.5097	68.326	71.3884	77.2197	63.6134	0.0019	0.1121	0.1197	0.1065	158	0.016
Si	7636.93	74492	500.123	7577.32	59.6125	74.6184	44.6066	0.8826	22.0119	23.5052	20.0981	362	0.2912
Cl	60.0119	1200	3.5121	53.2117	6.8002	7.9002	5.7001	0.0926	0.3918	0.4184	0.2834	220	0.0447
K	164.99	1649	9.5934	145.349	19.6413	20.0013	19.2012	0.0378	0.4923	0.5257	0.3229	243	0.0437
Ca	522.299	5214	33.7537	511.398	10.9004	11.0004	10.8004	0.1654	5.7196	6.1077	3.6595	600	0.2569
Ti	78.3202	1566	1.4597	22.1163	56.204	63.8134	47.5075	0.0014	0.0515	0.0549	0.0275	199	0.0181
Fe	197.078	3939	11.9543	181.118	15.9597	16.7009	15.3008	0.0186	2.1898	2.3384	1.0055	552	0.1205
Y	601.09	11998	33.5151	507.783	93.3066	88.5259	97.1311	0.0349	2.2577	2.4109	0.6512	490	0.0856
Zr	797.091	15900	50.3394	762.687	34.404	38.4049	28.0026	0.1504	8.4756	9.0506	2.3826	744	0.2308
Nb	11.5504	231	0.5974	9.0504	2.5	3.5	3.6	0.0063	0.9103	0.9721	0.2513	1843	0.2538
Ce	49.8082	996	2.0273	30.7147	19.0935	21.8016	17.401	0.016	1.1284	1.2049	0.2065	1834	0.2067
Mn	140.215	2803	8.4457	127.96	12.2543	12.1005	12.5005	0.0444	1.7018	1.8173	0.7944	533	0.1157
Hf	132.308	2645	3.1935	48.3841	83.9237	95.7302	72.1172	0.0023	0.3341	0.3568	0.048	722	0.0684
La	33.2036	664	1.0953	16.5944	16.6093	17.601	15.9008	0.0084	0.5903	0.6304	0.109	1657	0.1687
Nd	19.768	593	0.5954	9.0209	10.7471	11.8671	9.467	0.008	0.5773	0.6165	0.1026	1958	0.1944
O									36.646	39.1322	58.7338
Total									93.6468	100	100
Formula	Oxide
Na2O	13.5557
Al2O3	0.2118
SiO2	47.0916
Cl	0.3918
K2O	0.5931
CaO	8.0029
TiO2	0.0858
FeO	2.8172
Y2O3	2.8672
ZrO2	11.4488
Nb2O5	1.3023
Ce2O3	1.3216
MnO	2.1975
HfO2	0.394
La2O3	0.6923
Nd2O3	0.6734
Total	93.6468
	4 / 1 . X = -20535. Y = 1350. Z = -6.
Na	2387.46	23688	152.867	2316.31	71.1552	75.2187	68.6155	1.09	10.3303	10.9907	11.4837	607	0.3952
Al	132.558	2650	3.8728	58.6826	73.8754	80.8216	64.6138	0.0016	0.0966	0.1027	0.0915	161	0.0159
Si	7622.11	74351	498.971	7560.6	61.5133	76.8195	46.2071	0.8806	22.0189	23.4265	20.0363	369	0.2915
Cl	60.412	1208	3.591	54.4119	6.0001	7.1002	4.9001	0.0946	0.4003	0.4259	0.2886	207	0.0447
K	150.475	1504	8.651	131.083	19.3912	18.4011	20.6014	0.0341	0.4438	0.4721	0.2901	241	0.0419
Ca	513.77	5129	33.3128	504.769	9.0003	8.4002	9.6003	0.1633	5.6407	6.0013	3.5968	545	0.2541
Ti	80.0712	1601	1.5179	23.0004	57.0708	59.3116	54.5098	0.0015	0.0534	0.0569	0.0285	200	0.0183
Fe	193.524	3868	11.7049	177.358	16.1656	18.6011	14.0007	0.0182	2.144	2.281	0.9811	556	0.1195
Y	605.056	12077	33.571	508.68	96.3752	89.9267	101.534	0.0349	2.2659	2.4107	0.6513	499	0.0861
Zr	773.871	15438	48.805	739.514	34.3578	37.7047	29.0028	0.1458	8.229	8.7551	2.3055	745	0.2273
Nb	11.8505	237	0.6171	9.3505	2.5	2.6	3.6	0.0065	0.9417	1.0019	0.2591	1845	0.2569
Ce	51.8589	1037	2.2269	33.7424	18.1165	18.3011	18.0011	0.0176	1.2388	1.318	0.2259	1786	0.2086
Mn	151.726	3033	9.201	139.418	12.3082	12.0005	12.8005	0.0484	1.8537	1.9722	0.8623	534	0.1206
Hf	131.407	2627	3.2196	48.784	82.6229	93.5289	71.717	0.0023	0.3377	0.3593	0.0484	718	0.0683
La	34.1038	682	1.132	17.1529	16.951	19.4012	15.2008	0.0087	0.6097	0.6487	0.1122	1673	0.1706
Nd	21.1348	634	0.7114	10.7789	10.3559	10.667	10.0003	0.0096	0.6896	0.7336	0.1222	1922	0.1977
O									36.6974	39.0433	58.6167
Total									93.9915	100	100
Formula	Oxide
Na2O	13.925
Al2O3	0.1824
SiO2	47.1066
Cl	0.4003
K2O	0.5346
CaO	7.8925
TiO2	0.0892
FeO	2.7582
Y2O3	2.8776
ZrO2	11.1158
Nb2O5	1.3472
Ce2O3	1.451
MnO	2.3936
HfO2	0.3983
La2O3	0.7151
Nd2O3	0.8043
Total	93.9915
	5 / 1 . X = -20100. Y = 725. Z = -3.
Na	2313.02	22955	147.937	2241.37	71.6477	68.8156	73.4178	1.0549	9.9633	10.7023	11.0988	607	0.3831
Al	197.178	3941	8.0034	121.259	75.9194	84.6236	64.3136	0.0033	0.1982	0.2129	0.1882	163	0.0182
Si	7768.9	75747	508.213	7699.88	69.0177	93.6289	44.4065	0.8969	22.3358	23.9926	20.3671	389	0.294
Cl	64.9639	1299	3.905	59.1638	5.8001	7.0002	4.6001	0.1029	0.4369	0.4694	0.3156	204	0.0468
K	90.6271	906	4.8206	73.0361	17.591	18.4011	16.6009	0.019	0.248	0.2664	0.1625	231	0.0335
Ca	496.713	4959	32.1639	487.313	9.4003	9.2003	9.6003	0.1576	5.4604	5.8655	3.4891	559	0.2503
Ti	87.025	1740	2.0655	31.2946	55.7304	60.9122	49.8082	0.002	0.073	0.0784	0.039	199	0.0187
Fe	227.22	4541	13.9255	210.984	16.2362	17.401	15.2008	0.0217	2.5558	2.7454	1.172	558	0.1295
Y	583.873	11655	32.7295	495.881	87.9923	84.3235	90.9273	0.034	2.2114	2.3755	0.637	477	0.0843
Zr	845.804	16869	53.7374	814.17	31.6341	34.4039	27.2024	0.1606	9.0782	9.7516	2.5487	716	0.2391
Nb	5.1001	102	0.1716	2.6001	2.5	4.1001	5.0001	0.0018	0.2621	0.2816	0.0723	1847	0.1865
Ce	40.5054	810	1.5275	23.1429	17.3625	16.5009	17.9011	0.0121	0.8515	0.9146	0.1556	1752	0.1891
Mn	123.701	2473	7.3527	111.4	12.3005	13.3006	10.7004	0.0387	1.4839	1.594	0.6917	534	0.1087
Hf	124.601	2491	2.6155	39.6269	84.9744	97.6315	72.3173	0.0019	0.2732	0.2935	0.0392	725	0.0672
La	25.1021	502	0.6062	9.1846	15.9175	16.5009	15.5008	0.0046	0.3272	0.3515	0.0603	1625	0.1531
Nd	18.9345	568	0.5771	8.7431	10.1915	11.0004	9.267	0.0078	0.5606	0.6022	0.0995	1911	0.1903
O									36.775	39.5028	58.8632
Total									93.0947	100	100
Formula	Oxide
Na2O	13.4303
Al2O3	0.3746
SiO2	47.7847
Cl	0.4369
K2O	0.2988
CaO	7.6403
TiO2	0.1217
FeO	3.2881
Y2O3	2.8084
ZrO2	12.2629
Nb2O5	0.375
Ce2O3	0.9973
MnO	1.9161
HfO2	0.3222
La2O3	0.3837
Nd2O3	0.6539
Total	93.0947
	6 / 1 . X = -19644. Y = 1342. Z = -3.
Na	2419.97	24008	154.836	2345.66	74.3105	75.4188	73.6179	1.1041	10.3321	11.1551	11.676	613	0.3947
Al	176.753	3533	6.4428	97.6037	79.1494	85.0239	71.3168	0.0027	0.1594	0.1721	0.1535	166	0.0176
Si	7505.08	73237	490.885	7436.57	68.5169	89.0262	48.0076	0.8663	21.5384	23.2541	19.9239	387	0.287
Cl	80.2212	1604	4.8663	73.7211	6.5001	7.3002	5.7001	0.1282	0.5452	0.5886	0.3995	216	0.0533
K	118.346	1183	6.3432	96.0946	22.2516	23.6018	20.6014	0.025	0.3266	0.3526	0.217	259	0.0382
Ca	469.326	4686	30.1549	456.825	12.5006	9.0003	16.0008	0.1478	5.116	5.5235	3.3162	643	0.2432
Ti	73.6179	1472	1.1033	16.7137	56.9042	63.8134	49.0079	0.0011	0.0389	0.042	0.0211	200	0.0178
Fe	153.678	3072	8.9991	136.33	17.3481	21.0015	14.1007	0.014	1.6457	1.7768	0.7656	575	0.1073
Y	764.675	15255	43.7928	663.43	101.245	94.6295	106.537	0.0455	2.9376	3.1716	0.8584	508	0.0979
Zr	811.518	16187	51.2807	776.867	34.6501	36.8045	31.2032	0.1532	8.6025	9.2878	2.4501	744	0.2323
Nb	13.7006	274	0.7393	11.2006	2.5	3.9001	3.9001	0.0078	1.1286	1.2186	0.3156	1846	0.2734
Ce	47.4074	948	1.8863	28.5755	18.8319	18.4011	19.1012	0.0149	1.0491	1.1327	0.1945	1820	0.2024
Mn	148.423	2967	8.9635	135.791	12.6313	12.9006	12.2005	0.0471	1.8039	1.9475	0.853	540	0.1192
Hf	131.057	2620	3.1377	47.5333	83.5234	94.2293	72.8175	0.0023	0.3271	0.3532	0.0476	717	0.0679
La	31.9534	639	0.9342	14.1523	17.8011	18.5011	17.301	0.0072	0.5032	0.5433	0.0941	1714	0.1684
Nd	19.5013	585	0.4749	7.1941	12.3072	13.8006	10.6004	0.0064	0.4598	0.4965	0.0828	2092	0.1979
O									36.1078	38.9841	58.6309
Total									92.622	100	100
Formula	Oxide
Na2O	13.9274
Al2O3	0.3012
SiO2	46.0787
Cl	0.5452
K2O	0.3934
CaO	7.1583
TiO2	0.0648
FeO	2.1172
Y2O3	3.7306
ZrO2	11.6203
Nb2O5	1.6146
Ce2O3	1.2288
MnO	2.3292
HfO2	0.3858
La2O3	0.5901
Nd2O3	0.5364
Total	92.622
	7 / 1 . X = -19469. Y = 601. Z = .
Na	2546.22	25250	156.986	2475.25	70.9705	71.2167	70.8165	1.1194	9.7554	10.9896	11.8129	536	0.3697
Al	64.8639	1297	-0.0548	-0.8648	65.7287	71.5169	58.0111	0	-0.0013	-0.0015	-0.0013	138	0.0114
Si	7703.06	75121	482.824	7612.83	90.2325	131.657	48.8079	0.8521	20.3495	22.924	20.1706	410	0.2695
Cl	6.5501	131	0.0603	0.95	5.6001	5.9001	5.3001	0.0016	0.0071	0.008	0.0056	202	0.0174
K	42.3059	423	1.5396	24.2748	18.0311	19.2012	16.6009	0.0061	0.0812	0.0915	0.0578	230	0.0247
Ca	45.3068	453	2.328	36.7065	8.6002	8.4002	8.8003	0.0114	0.3995	0.4501	0.2775	520	0.076
Ti	56.9107	1138	-0.1658	-2.6144	59.5251	63.2132	55.3101	-0.0002	-0.0058	-0.0066	-0.0034	196	0.0161
Fe	17.701	354	0.1425	2.2473	15.4537	17.201	13.9006	0.0002	0.0256	0.0289	0.0128	513	0.0441
Y	103.986	2079	-0.3367	-5.3094	109.295	103.235	114.143	-0.0004	-0.0217	-0.0245	-0.0068	488	0.0401
Zr	2229.53	44265	138.785	2188.26	41.2752	49.5081	28.1026	0.4147	22.7844	25.667	6.9534	763	0.4021
Nb	2.55	51	0.0032	0.05	2.5	6.7001	5.1001	0	0.0046	0.0052	0.0014	1688	0.1389
Ce	17.451	349	0.0622	0.9809	16.4701	17.701	15.7008	0.0005	0.0343	0.0387	0.0068	1624	0.1368
Mn	12.1005	242	0.0444	0.7001	11.4004	11.9005	10.6004	0.0002	0.0088	0.0099	0.0045	486	0.0409
Hf	172.098	3440	5.0655	79.8693	92.2284	101.834	82.6225	0.0037	0.5048	0.5687	0.0787	692	0.0696
La	17.501	350	0.0856	1.3501	16.1509	17.201	15.4008	0.0007	0.0458	0.0516	0.0092	1559	0.1321
Nd	10.3004	309	-0.0514	-0.8112	11.1115	11.2671	10.9337	-0.0007	-0.0491	-0.0554	-0.0095	1885	0.1536
O									34.8463	39.2548	60.6298
Total									88.7694	100	100
Formula	Oxide
Na2O	13.1501
Al2O3	-0.0024
SiO2	43.5351
Cl	0.0071
K2O	0.0979
CaO	0.559
TiO2	-0.0097
FeO	0.033
Y2O3	-0.0276
ZrO2	30.7772
Nb2O5	0.0066
Ce2O3	0.0402
MnO	0.0114
HfO2	0.5954
La2O3	0.0537
Nd2O3	-0.0573
Total	88.7694
	8 / 1 . X = -18604. Y = 1447. Z = .
Na	2294.24	22770	148.514	2223.38	70.8627	70.6165	71.0166	1.059	10.0204	10.7783	11.1945	612	0.3857
Al	154.729	3093	5.5793	83.5264	71.2025	75.6189	65.3141	0.0023	0.1386	0.1491	0.1319	160	0.0168
Si	7630.84	74434	505.486	7567.52	63.3139	77.82	48.8079	0.8921	22.2394	23.9215	20.3376	378	0.2944
Cl	63.3132	1266	3.7749	56.5131	6.8002	7.4002	6.2001	0.0995	0.4217	0.4536	0.3055	223	0.0467
K	120.148	1201	6.8137	102.007	18.1411	15.8008	21.0015	0.0268	0.3502	0.3767	0.23	237	0.0383
Ca	496.312	4955	32.3504	484.311	12.0005	10.8004	13.2006	0.1586	5.4875	5.9026	3.5165	637	0.2534
Ti	89.4764	1789	2.3196	34.7264	54.75	60.9122	47.7075	0.0023	0.0819	0.088	0.0439	199	0.019
Fe	206.541	4128	12.7848	191.399	15.1419	15.3008	15.0007	0.0199	2.346	2.5235	1.0789	545	0.1248
Y	609.724	12170	34.7274	519.898	89.8268	82.3224	95.8303	0.0361	2.3467	2.5242	0.6779	488	0.0875
Zr	786.737	15694	50.3089	753.164	33.573	36.8045	28.4027	0.1503	8.497	9.1397	2.3924	746	0.2325
Nb	7.6502	153	0.344	5.1502	2.5	3.5	3.2	0.0036	0.5259	0.5657	0.1454	1871	0.2186
Ce	45.6069	912	1.8594	27.8366	17.7703	17.401	18.0011	0.0147	1.0361	1.1145	0.1899	1793	0.2007
Mn	128.204	2563	7.7358	115.811	12.3928	12.7005	11.9005	0.0407	1.561	1.6791	0.7298	543	0.112
Hf	117.996	2359	2.0721	31.0205	86.9754	99.0324	74.9185	0.0015	0.2168	0.2332	0.0312	744	0.0673
La	28.2026	564	0.8946	13.3936	14.8091	15.8008	14.1007	0.0069	0.4827	0.5192	0.0893	1586	0.1587
Nd	18.9345	568	0.603	9.0275	9.907	10.467	9.267	0.0081	0.5856	0.6299	0.1043	1906	0.1916
O									36.6307	39.4013	58.801
Total									92.9681	100	100
Formula	Oxide
Na2O	13.5072
Al2O3	0.2619
SiO2	47.5784
Cl	0.4217
K2O	0.4218
CaO	7.6781
TiO2	0.1365
FeO	3.0182
Y2O3	2.9802
ZrO2	11.4778
Nb2O5	0.7523
Ce2O3	1.2136
MnO	2.0157
HfO2	0.2557
La2O3	0.5661
Nd2O3	0.683
Total	92.9681
	9 / 1 . X = -17483. Y = 807. Z = 2.
Na	2418.96	23998	155.144	2350.32	68.631	74.4183	65.014	1.1063	10.4309	11.0429	11.4861	594	0.3981
Al	173.049	3459	6.7643	102.475	70.5737	76.6194	62.5129	0.0028	0.168	0.1779	0.1577	157	0.0172
Si	7747.33	75542	507.219	7684.02	63.3145	82.6225	44.0064	0.8951	22.3201	23.6298	20.1188	373	0.2939
Cl	61.6125	1232	3.6644	55.5124	6.1001	6.4001	5.8001	0.0966	0.4094	0.4335	0.2924	209	0.0454
K	159.684	1596	9.1966	139.323	20.3614	21.8016	18.6011	0.0362	0.4726	0.5003	0.306	248	0.0432
Ca	507.248	5064	32.8099	497.047	10.2004	11.2004	9.2003	0.1608	5.5661	5.8927	3.5157	581	0.2531
Ti	94.1793	1883	2.4209	36.675	57.5043	60.9122	53.6095	0.0024	0.0854	0.0905	0.0452	202	0.0193
Fe	213.55	4268	13.0301	197.397	16.1538	17.9011	14.6007	0.0203	2.3892	2.5294	1.083	556	0.1255
Y	648.886	12950	36.6597	555.369	93.5178	90.1268	96.2306	0.0381	2.4735	2.6187	0.7043	491	0.0895
Zr	823.984	16435	52.2962	792.25	31.7342	35.004	26.5023	0.1563	8.8176	9.335	2.4471	716	0.2352
Nb	6.6501	133	0.2739	4.1501	2.5	2	4.3001	0.0029	0.4186	0.4432	0.1141	1848	0.2049
Ce	44.1564	883	1.7595	26.6554	17.501	17.501	17.501	0.0139	0.9802	1.0377	0.1771	1758	0.1954
Mn	125.902	2517	7.4922	113.502	12.4005	13.4006	10.8004	0.0394	1.5107	1.5994	0.6962	536	0.1096
Hf	127.003	2539	2.9725	45.0307	81.9725	91.5276	72.4173	0.0022	0.3111	0.3294	0.0441	714	0.0673
La	26.2023	524	0.6563	9.9431	16.2592	14.8007	17.301	0.005	0.354	0.3748	0.0645	1641	0.1557
Nd	20.6014	618	0.7186	10.8855	9.7159	9.9337	9.467	0.0097	0.6974	0.7383	0.1224	1864	0.1944
O									37.0524	39.2266	58.6254
Total									94.4574	100	100
Formula	Oxide
Na2O	14.0606
Al2O3	0.3175
SiO2	47.751
Cl	0.4094
K2O	0.5693
CaO	7.7881
TiO2	0.1425
FeO	3.0737
Y2O3	3.1413
ZrO2	11.9108
Nb2O5	0.5989
Ce2O3	1.1481
MnO	1.9507
HfO2	0.3669
La2O3	0.4152
Nd2O3	0.8134
Total	94.4574
	10 / 1 . X = -18118. Y = -1142. Z = 5.
Na	2301.55	22842	147.493	2234.41	67.1381	75.0186	62.2128	1.0517	9.9784	10.6195	11.1395	591	0.3837
Al	151.876	3036	5.3403	80.9022	70.9739	75.5188	64.9139	0.0022	0.1328	0.1413	0.1263	158	0.0165
Si	7662.16	74732	501.445	7596.55	65.6152	82.8226	48.4077	0.8849	22.0686	23.4866	20.1667	380	0.2918
Cl	72.1172	1442	4.3083	65.267	6.8502	7.2002	6.5001	0.1135	0.4816	0.5125	0.3486	221	0.0499
K	102.635	1026	5.6487	85.5738	17.061	15.8008	18.6011	0.0222	0.2902	0.3088	0.1905	227	0.0352
Ca	470.429	4697	30.406	460.629	9.8003	8.4002	11.2004	0.149	5.1467	5.4774	3.2957	569	0.2425
Ti	74.5683	1491	1.1321	17.1508	57.4176	61.0123	53.3094	0.0011	0.0398	0.0423	0.0213	201	0.0179
Fe	218.307	4363	13.2427	200.618	17.6893	18.8012	16.7009	0.0206	2.4208	2.5763	1.1125	580	0.1268
Y	638.693	12747	36.0786	546.565	92.128	88.1256	95.33	0.0375	2.4293	2.5854	0.7013	487	0.0885
Zr	837.357	16701	53.0728	804.015	33.3423	38.3048	25.4021	0.1586	8.9318	9.5057	2.513	732	0.237
Nb	10.0503	201	0.4984	7.5503	2.5	2.9	2.4	0.0052	0.7599	0.8088	0.2099	1844	0.2399
Ce	50.5584	1011	2.1811	33.042	17.5164	17.701	17.401	0.0172	1.2107	1.2885	0.2218	1753	0.2053
Mn	144.869	2896	8.8077	133.43	11.4389	11.9005	10.7004	0.0463	1.7707	1.8844	0.8272	514	0.1172
Hf	129.706	2593	3.0353	45.982	83.7235	94.2293	73.2177	0.0022	0.3177	0.3381	0.0457	721	0.068
La	33.4037	668	1.0695	16.2027	17.201	17.9011	16.7009	0.0082	0.5748	0.6117	0.1062	1681	0.1695
Nd	20.6681	620	0.7485	11.3389	9.3292	10.2003	8.3336	0.0101	0.724	0.7705	0.1288	1821	0.1928
O									36.6848	39.042	58.8451
Total									93.9624	100	100
Formula	Oxide
Na2O	13.4506
Al2O3	0.2509
SiO2	47.2129
Cl	0.4816
K2O	0.3495
CaO	7.2013
TiO2	0.0664
FeO	3.1143
Y2O3	3.0851
ZrO2	12.0651
Nb2O5	1.0871
Ce2O3	1.4181
MnO	2.2863
HfO2	0.3747
La2O3	0.6741
Nd2O3	0.8445
Total	93.9624
	11 / 1 . X = -18676. Y = -1002. Z = 5.
Na	2371.82	23534	151.584	2296.86	74.9571	69.4159	78.4203	1.0809	10.2281	10.974	11.4116	622	0.392
Al	146.421	2927	5.1575	78.1481	68.2727	74.0181	60.6121	0.0021	0.1283	0.1377	0.122	155	0.0162
Si	7700.96	75101	504.167	7639.34	61.6137	80.2212	43.0061	0.8897	22.2082	23.8277	20.2823	368	0.293
Cl	72.9175	1458	4.314	65.3674	7.5502	7.7002	7.4002	0.1137	0.482	0.5172	0.3487	232	0.0502
K	119.147	1191	6.7063	101.616	17.531	17.8011	17.201	0.0264	0.3448	0.3699	0.2262	230	0.0376
Ca	472.837	4721	30.585	463.436	9.4003	10.0003	8.8003	0.1499	5.1868	5.5651	3.3194	558	0.2435
Ti	70.8165	1416	1.1404	17.2804	53.5361	56.0104	50.7085	0.0011	0.0402	0.0431	0.0215	194	0.0174
Fe	220.01	4397	13.4215	203.368	16.6421	18.6011	14.9007	0.0209	2.4608	2.6403	1.1302	564	0.1274
Y	603.55	12047	33.7387	511.222	92.3281	89.8266	94.3294	0.0351	2.2801	2.4464	0.6578	489	0.086
Zr	802.218	16002	50.7606	769.145	33.0729	36.8045	27.1024	0.1517	8.5734	9.1987	2.4107	732	0.2322
Nb	8.4502	169	0.3927	5.9502	2.5	3.4	2	0.0041	0.6001	0.6438	0.1657	1847	0.2243
Ce	49.158	983	2.0771	31.4723	17.6857	19.1012	16.8009	0.0164	1.1561	1.2404	0.2116	1765	0.2038
Mn	135.16	2702	8.1438	123.398	11.762	11.8005	11.7005	0.0428	1.6419	1.7616	0.7666	522	0.1135
Hf	121.299	2425	2.3742	35.9742	85.3243	94.5295	76.1191	0.0017	0.2487	0.2669	0.0357	729	0.0668
La	30.103	602	0.7948	12.0436	18.0594	20.8014	16.1009	0.0061	0.4283	0.4596	0.0791	1727	0.1657
Nd	19.5679	587	0.5915	8.9631	10.6048	10.667	10.5337	0.008	0.5739	0.6157	0.1021	1946	0.1934
O									36.6214	39.292	58.7087
Total									93.203	100	100
Formula	Oxide
Na2O	13.7873
Al2O3	0.2425
SiO2	47.5115
Cl	0.482
K2O	0.4153
CaO	7.2574
TiO2	0.067
FeO	3.1658
Y2O3	2.8956
ZrO2	11.581
Nb2O5	0.8584
Ce2O3	1.3541
MnO	2.12
HfO2	0.2933
La2O3	0.5023
Nd2O3	0.6694
Total	93.203
	12 / 1 . X = -19330. Y = -1618. Z = 5.
Na	2439.79	24203	156.541	2371.74	68.0461	74.8185	63.8134	1.1162	10.4624	11.0777	11.5319	587	0.3988
Al	218.307	4363	9.5131	144.132	74.1755	81.722	64.1136	0.0039	0.2355	0.2493	0.2212	161	0.0188
Si	7811.5	76152	511.487	7749.49	62.0143	83.8232	40.2053	0.9027	22.4559	23.7765	20.2605	368	0.2948
Cl	69.516	1390	4.1031	62.1658	7.3502	8.2002	6.5001	0.1081	0.4607	0.4878	0.3293	230	0.0491
K	110.941	1109	6.0867	92.2194	18.7212	19.8013	17.401	0.024	0.3139	0.3323	0.2034	238	0.0368
Ca	424.093	4235	27.1728	411.692	12.4005	11.2004	13.6006	0.1332	4.6143	4.8856	2.9173	641	0.2307
Ti	67.7151	1354	0.6506	9.8573	57.8578	62.0127	53.1093	0.0006	0.0229	0.0243	0.0121	202	0.0175
Fe	214.902	4295	13.0492	197.707	17.1951	17.301	17.101	0.0203	2.3888	2.5293	1.0839	573	0.1259
Y	568.264	11344	30.9375	468.731	99.5329	90.527	106.738	0.0322	2.0852	2.2078	0.5943	506	0.0832
Zr	948.862	18918	60.3221	913.935	34.9272	39.005	28.4027	0.1802	10.1677	10.7656	2.8245	751	0.2548
Nb	5.7501	115	0.2145	3.2501	2.5	3.2	2.7	0.0023	0.3267	0.3459	0.0891	1841	0.1938
Ce	43.1562	863	1.6486	24.9781	18.178	15.9008	19.6013	0.013	0.9168	0.9707	0.1658	1788	0.1943
Mn	128.605	2571	7.7464	117.366	11.2389	12.2005	9.7003	0.0407	1.5597	1.6514	0.7194	510	0.1103
Hf	133.159	2662	3.1539	47.7843	85.3742	92.5282	78.2202	0.0023	0.3293	0.3486	0.0467	726	0.0686
La	28.9028	578	0.8956	13.5687	15.3341	15.8008	15.0007	0.0069	0.4823	0.5106	0.088	1591	0.1587
Nd	18.0011	540	0.4937	7.4807	10.5204	10.8004	10.2003	0.0066	0.4785	0.5066	0.0841	1936	0.1876
O									37.1453	39.3298	58.8286
Total									94.4457	100	100
Formula	Oxide
Na2O	14.1031
Al2O3	0.445
SiO2	48.0415
Cl	0.4607
K2O	0.3781
CaO	6.4563
TiO2	0.0382
FeO	3.0732
Y2O3	2.6481
ZrO2	13.7345
Nb2O5	0.4673
Ce2O3	1.0738
MnO	2.0139
HfO2	0.3883
La2O3	0.5656
Nd2O3	0.5581
Total	94.4457
	13 / 1 . X = -19512. Y = -961. Z = 1.
Na	2344.4	23264	149.869	2270.64	73.7564	73.0176	74.2182	1.0687	10.1134	10.9281	11.4045	617	0.3882
Al	145.77	2914	4.9877	75.5679	70.2022	77.0196	61.1123	0.0021	0.1241	0.1341	0.1192	157	0.0162
Si	7586.81	74015	496.558	7523.29	63.5144	81.4219	45.6069	0.8763	21.8873	23.6506	20.2035	374	0.2903
Cl	72.2672	1445	4.3243	65.5171	6.7502	6.8002	6.7001	0.114	0.4832	0.5221	0.3533	220	0.0499
K	105.437	1054	5.6911	86.2255	19.2112	18.4011	20.2014	0.0224	0.2925	0.316	0.1939	241	0.0359
Ca	470.73	4700	30.2972	459.03	11.7005	14.2007	9.2003	0.1485	5.1337	5.5473	3.3207	621	0.2431
Ti	69.0157	1380	0.5771	8.7435	60.2723	68.8156	50.5084	0.0006	0.0203	0.0219	0.011	206	0.0177
Fe	198.28	3963	12.0255	182.196	16.0832	19.1012	13.4006	0.0187	2.2019	2.3793	1.0221	554	0.1209
Y	617.405	12323	34.3725	520.774	96.6309	90.6271	101.434	0.0357	2.3197	2.5065	0.6764	499	0.0871
Zr	791.814	15795	49.9494	756.779	35.0349	38.3048	29.8029	0.1492	8.4258	9.1046	2.3946	752	0.2304
Nb	10.9004	218	0.5544	8.4004	2.5	3	3.5	0.0058	0.8466	0.9148	0.2362	1846	0.2483
Ce	50.3584	1007	2.0732	31.411	18.9473	19.5013	18.6011	0.0164	1.1527	1.2455	0.2133	1825	0.2072
Mn	149.374	2986	9.0472	137.073	12.3005	12.3005	12.3005	0.0476	1.822	1.9687	0.8598	533	0.1195
Hf	131.007	2619	3.0152	45.6823	85.3243	95.2299	75.4188	0.0022	0.3158	0.3412	0.0459	728	0.0685
La	33.0036	660	1.0573	16.0193	16.9843	18.5011	15.9008	0.0081	0.5692	0.615	0.1062	1674	0.1687
Nd	20.9014	627	0.6068	9.1943	11.7071	12.7339	10.5337	0.0082	0.588	0.6354	0.1057	2042	0.2008
O									36.2484	39.1686	58.7336
Total									92.5443	100	100
Formula	Oxide
Na2O	13.6326
Al2O3	0.2345
SiO2	46.8252
Cl	0.4832
K2O	0.3523
CaO	7.1831
TiO2	0.0339
FeO	2.8327
Y2O3	2.9458
ZrO2	11.3815
Nb2O5	1.2111
Ce2O3	1.3501
MnO	2.3526
HfO2	0.3724
La2O3	0.6675
Nd2O3	0.6859
Total	92.5444
	14 / 1 . X = -20019. Y = -1367. Z = 1.
Na	2450.56	24309	157.31	2383.62	66.9379	68.4154	66.0144	1.1217	10.5373	11.219	11.6672	584	0.4013
Al	178.505	3568	7.008	106.188	72.3175	80.4213	61.5125	0.0029	0.1739	0.1852	0.1641	159	0.0174
Si	7743.76	75508	506.939	7681.34	62.4141	81.622	43.2062	0.8946	22.2978	23.7403	20.2094	370	0.2936
Cl	71.4168	1428	4.2777	64.8167	6.6001	6.3001	6.9002	0.1127	0.4793	0.5103	0.3441	218	0.0497
K	116.545	1165	6.5286	98.9238	17.621	16.0008	19.6013	0.0257	0.3362	0.358	0.2189	231	0.0373
Ca	451.171	4505	29.1156	441.17	10.0003	11.0004	9.0003	0.1427	4.942	5.2617	3.1387	576	0.2378
Ti	79.6209	1592	1.3302	20.1558	59.4651	64.4137	53.8096	0.0013	0.0469	0.0499	0.0249	205	0.0184
Fe	212.499	4247	12.9417	196.098	16.4009	17.301	15.6008	0.0201	2.3711	2.5245	1.0808	560	0.1251
Y	634.626	12666	35.5291	538.351	96.275	95.33	97.0311	0.0369	2.3977	2.5528	0.6865	498	0.0884
Zr	870.292	17356	55.1324	835.388	34.9041	37.9047	30.103	0.1647	9.3008	9.9025	2.5954	751	0.2429
Nb	6.1001	122	0.2376	3.6001	2.5	3.6	3.1	0.0025	0.363	0.3864	0.0994	1847	0.1985
Ce	45.907	918	1.7929	27.1673	18.7396	20.4014	17.701	0.0142	0.9978	1.0624	0.1813	1817	0.1999
Mn	125.952	2518	7.4874	113.452	12.5005	13.5006	10.9004	0.0394	1.5086	1.6062	0.699	538	0.1096
Hf	129.806	2595	2.9686	44.9814	84.8242	96.1305	73.5178	0.0022	0.3105	0.3306	0.0443	725	0.0681
La	27.3525	547	0.7134	10.8099	16.5426	18.0011	15.5008	0.0055	0.3844	0.4093	0.0704	1653	0.1582
Nd	19.2346	577	0.6176	9.3587	9.8759	10.467	9.2003	0.0083	0.5989	0.6377	0.1057	1877	0.19
O									36.8775	39.2633	58.67
Total									93.9237	100	100
Formula	Oxide
Na2O	14.204
Al2O3	0.3287
SiO2	47.7033
Cl	0.4793
K2O	0.405
CaO	6.9149
TiO2	0.0782
FeO	3.0504
Y2O3	3.0449
ZrO2	12.5635
Nb2O5	0.5192
Ce2O3	1.1687
MnO	1.9479
HfO2	0.3661
La2O3	0.4508
Nd2O3	0.6986
Total	93.9236
	15 / 1 . X = -20780. Y = -1048. Z = .
Na	2384.52	23659	153.268	2322.38	62.1359	68.4154	58.2112	1.0929	10.3197	10.9803	11.4269	566	0.3943
Al	184.012	3678	7.4242	112.495	71.517	77.2197	63.9135	0.0031	0.1846	0.1964	0.1741	158	0.0176
Si	7753.64	75602	507.664	7692.33	61.3135	79.4208	43.2062	0.8959	22.3342	23.764	20.2435	367	0.2939
Cl	64.9639	1299	3.8419	58.2138	6.7502	6.9002	6.6001	0.1012	0.4298	0.4573	0.3086	220	0.0469
K	100.734	1007	5.5161	83.5825	17.151	17.601	16.6009	0.0217	0.2837	0.3019	0.1847	228	0.035
Ca	477.852	4771	30.7642	466.152	11.7005	12.0005	11.4004	0.1508	5.2169	5.5508	3.3134	622	0.2453
Ti	76.9695	1539	1.4422	21.8528	55.1168	59.4116	50.2083	0.0014	0.0508	0.0541	0.027	197	0.0179
Fe	217.206	4341	13.2166	200.263	16.9421	17.101	16.8009	0.0206	2.4224	2.5774	1.1042	569	0.1267
Y	661.641	13204	37.2592	564.566	97.0755	96.6308	97.4313	0.0387	2.5154	2.6764	0.7202	501	0.0906
Zr	836.302	16680	52.943	802.213	34.0886	38.7049	26.7024	0.1582	8.9328	9.5046	2.4928	742	0.2375
Nb	6.7502	135	0.2805	4.2502	2.5	3.1	2.7	0.0029	0.4289	0.4563	0.1175	1849	0.2061
Ce	48.1577	963	1.9775	29.9642	18.1934	20.9014	16.5009	0.0156	1.1005	1.171	0.1999	1790	0.2028
Mn	128.304	2565	7.6167	115.412	12.8929	13.2006	12.4005	0.04	1.5349	1.6332	0.7112	546	0.1107
Hf	117.596	2351	1.8855	28.5691	89.0265	99.5327	78.5203	0.0014	0.1975	0.2101	0.0282	744	0.0668
La	28.9028	578	0.7365	11.1601	17.7427	18.5011	17.201	0.0056	0.3968	0.4222	0.0727	1712	0.163
Nd	21.3348	640	0.731	11.0767	10.2581	10.1337	10.4004	0.0098	0.709	0.7544	0.1251	1913	0.1982
O									36.9255	39.2894	58.7497
Total									93.9834	100	100
Formula	Oxide
Na2O	13.9107
Al2O3	0.3487
SiO2	47.7812
Cl	0.4298
K2O	0.3417
CaO	7.2994
TiO2	0.0848
FeO	3.1164
Y2O3	3.1944
ZrO2	12.0664
Nb2O5	0.6135
Ce2O3	1.2891
MnO	1.982
HfO2	0.2329
La2O3	0.4654
Nd2O3	0.8269
Total	93.9834
	16 / 1 . X = -21024. Y = -1766. Z = 1.
Na	2360.45	23422	151.144	2290.2	70.2471	72.2172	69.0157	1.0778	10.1923	10.8637	11.3423	602	0.3906
Al	156.13	3121	5.5596	84.2417	71.8887	79.2207	62.1127	0.0023	0.1382	0.1473	0.131	159	0.0166
Si	7696.54	75059	503.863	7634.73	61.8134	77.2197	46.4071	0.8892	22.1784	23.6394	20.2028	369	0.2926
Cl	73.4178	1468	4.4394	67.2677	6.1501	5.5001	6.8002	0.117	0.4962	0.5289	0.3581	210	0.0504
K	129.255	1292	7.1892	108.934	20.3214	21.4015	19.0012	0.0283	0.3695	0.3939	0.2418	248	0.0394
Ca	469.928	4692	30.195	457.527	12.4005	13.6006	11.2004	0.148	5.1173	5.4544	3.2665	639	0.2431
Ti	80.0712	1601	1.6847	25.528	54.5432	57.811	50.8085	0.0017	0.0593	0.0632	0.0317	196	0.0181
Fe	215.403	4305	13.039	197.572	17.8305	18.2011	17.501	0.0203	2.3871	2.5444	1.0936	583	0.1262
Y	627.497	12524	35.1452	532.534	94.9632	88.1256	100.433	0.0365	2.3703	2.5264	0.6821	495	0.0878
Zr	827.202	16499	52.4222	794.321	32.8806	36.3044	27.4025	0.1566	8.8361	9.4181	2.4782	728	0.2357
Nb	8.8503	177	0.4191	6.3503	2.5	3.6	2.9	0.0044	0.6397	0.6818	0.1761	1845	0.2282
Ce	48.6078	972	2.089	31.653	16.9548	19.6013	15.3008	0.0165	1.1613	1.2378	0.212	1727	0.2016
Mn	140.215	2803	8.4738	128.399	11.8159	13.2006	9.6003	0.0445	1.7061	1.8185	0.7945	523	0.1155
Hf	129.956	2598	2.9488	44.6812	85.2745	98.1318	72.4173	0.0021	0.3087	0.329	0.0442	728	0.0682
La	30.6531	613	0.9719	14.7273	15.9258	17.501	14.8007	0.0075	0.5232	0.5576	0.0964	1620	0.1628
Nd	19.968	599	0.6182	9.3676	10.6004	11.0671	10.067	0.0083	0.599	0.6384	0.1062	1943	0.1945
O									36.7372	39.1572	58.7424
Total									93.8197	100	100
Formula	Oxide
Na2O	13.739
Al2O3	0.2611
SiO2	47.4478
Cl	0.4962
K2O	0.4452
CaO	7.1601
TiO2	0.0989
FeO	3.071
Y2O3	3.0101
ZrO2	11.9358
Nb2O5	0.9151
Ce2O3	1.3602
MnO	2.203
HfO2	0.364
La2O3	0.6135
Nd2O3	0.6986
Total	93.8197
	17 / 1 . X = -21598. Y = -1844. Z = -1.
Na	2378.42	23599	152.328	2308.13	70.2932	72.0171	69.2158	1.0862	10.2764	11.0049	11.4861	603	0.3933
Al	142.967	2858	4.8352	73.2656	69.7019	75.0186	62.6129	0.002	0.1204	0.1289	0.1146	156	0.0161
Si	7639.46	74516	500.386	7582.05	57.4118	74.4183	40.4054	0.8831	22.0441	23.607	20.1687	356	0.2915
Cl	67.415	1348	4.0762	61.7649	5.6501	6.5001	4.8001	0.1074	0.4556	0.4879	0.3302	201	0.0478
K	119.247	1192	6.5861	99.7957	19.4513	20.8014	17.8011	0.0259	0.3385	0.3625	0.2225	242	0.0379
Ca	464.611	4639	29.9498	453.811	10.8004	9.8003	11.8005	0.1468	5.0749	5.4346	3.2536	597	0.2413
Ti	76.4693	1529	1.2336	18.6915	57.7778	62.9131	51.9089	0.0012	0.0434	0.0465	0.0233	201	0.0181
Fe	214.802	4293	13.1294	198.942	15.8597	18.4011	13.6006	0.0204	2.4038	2.5742	1.106	550	0.1256
Y	632.015	12614	35.0838	531.604	100.411	94.1292	105.437	0.0365	2.3668	2.5346	0.6841	509	0.0883
Zr	814.534	16247	51.577	781.515	33.019	34.904	30.003	0.1541	8.6963	9.3129	2.4497	730	0.2338
Nb	9.5003	190	0.462	7.0003	2.5	3.6	4.5001	0.0049	0.7053	0.7553	0.1951	1846	0.2347
Ce	51.7088	1034	2.184	33.0923	18.6165	21.2015	17.001	0.0173	1.2139	1.3	0.2226	1809	0.2089
Mn	143.668	2872	8.5667	129.806	13.8622	14.9007	12.2005	0.045	1.7249	1.8472	0.8068	566	0.1175
Hf	129.405	2587	2.7903	42.2792	87.1261	104.736	69.516	0.002	0.2923	0.313	0.0421	736	0.0685
La	32.8036	656	0.9786	14.8275	17.9761	19.2012	17.101	0.0075	0.5267	0.564	0.0974	1721	0.17
Nd	19.2346	577	0.564	8.5453	10.6893	11.9338	9.267	0.0076	0.5463	0.5851	0.0973	1951	0.1923
O									36.5501	39.1414	58.7
Total									93.3797	100	100
Formula	Oxide
Na2O	13.8523
Al2O3	0.2274
SiO2	47.1606
Cl	0.4556
K2O	0.4078
CaO	7.1007
TiO2	0.0724
FeO	3.0925
Y2O3	3.0057
ZrO2	11.747
Nb2O5	1.009
Ce2O3	1.4219
MnO	2.2272
HfO2	0.3447
La2O3	0.6176
Nd2O3	0.6373
Total	93.3797
	18 / 1 . X = -21328. Y = -3173. Z = -1.
Na	2363.49	23452	152.665	2292.97	70.5241	69.4159	71.2167	1.0886	10.301	11.1154	11.5782	609	0.3947
Al	150.575	3010	5.5586	83.4884	67.0864	72.3173	60.1119	0.0023	0.1386	0.1496	0.1327	155	0.0165
Si	7566.01	73817	499.68	7504.99	61.0126	70.6165	51.4087	0.8818	22.0483	23.7915	20.2858	371	0.2927
Cl	70.0162	1400	4.2289	63.516	6.5001	6.6001	6.4001	0.1114	0.4727	0.5101	0.3446	218	0.0494
K	95.6302	956	5.1099	76.749	18.8812	19.6013	18.0011	0.0201	0.2627	0.2835	0.1736	241	0.0347
Ca	437.631	4370	28.5647	429.031	8.6002	9.8003	7.4002	0.14	4.8395	5.2221	3.1201	538	0.2353
Ti	98.482	1969	2.9951	44.9857	53.4963	59.6117	46.5071	0.0029	0.1054	0.1137	0.0568	195	0.0194
Fe	199.031	3978	12.0545	181.053	17.9775	19.3012	16.8009	0.0188	2.208	2.3826	1.0216	591	0.1227
Y	657.925	13130	37.4278	562.15	95.7749	87.3252	102.535	0.0389	2.5312	2.7313	0.7357	503	0.0912
Zr	775.228	15465	49.5426	744.11	31.1186	33.5037	27.3025	0.148	8.3724	9.0343	2.3717	717	0.2298
Nb	8.3502	167	0.3895	5.8502	2.5	3.9001	3.9001	0.0041	0.5965	0.6437	0.1659	1868	0.2258
Ce	55.11	1102	2.4364	36.5935	18.5165	20.3014	17.401	0.0193	1.3544	1.4615	0.2498	1820	0.2161
Mn	139.564	2790	8.4604	127.071	12.4928	13.3006	11.2004	0.0445	1.7039	1.8386	0.8014	542	0.1164
Hf	115.494	2309	2.0586	30.9197	84.5744	99.7328	69.4159	0.0015	0.2161	0.2332	0.0313	733	0.0664
La	28.5527	571	0.763	11.4601	17.0926	18.9012	15.8008	0.0058	0.4106	0.443	0.0764	1693	0.1625
Nd	22.8684	686	0.7777	11.6813	11.1871	11.9338	10.3337	0.0105	0.7536	0.8132	0.135	2014	0.2075
O									36.3582	39.2327	58.7194
Total									92.6731	100	100
Formula	Oxide
Na2O	13.8856
Al2O3	0.2619
SiO2	47.1697
Cl	0.4727
K2O	0.3165
CaO	6.7714
TiO2	0.1757
FeO	2.8406
Y2O3	3.2145
ZrO2	11.3094
Nb2O5	0.8533
Ce2O3	1.5864
MnO	2.2002
HfO2	0.2548
La2O3	0.4815
Nd2O3	0.879
Total	92.6732
	19 / 1 . X = -20678. Y = -3787. Z = 4.
Na	2423.73	24045	155.85	2361.27	62.4591	67.0148	59.6117	1.1113	10.5411	11.0881	11.6147	570	0.4018
Al	182.71	3652	7.7079	116.781	65.9287	69.616	61.0123	0.0032	0.1926	0.2026	0.1809	153	0.0175
Si	7731.56	75392	506.065	7667.34	64.2153	87.025	41.4057	0.8931	22.3558	23.516	20.1636	377	0.2946
Cl	52.5591	1051	3.1027	47.009	5.5501	6.4001	4.7001	0.0818	0.3471	0.3652	0.248	200	0.0414
K	117.445	1174	6.6587	100.885	16.5609	18.0011	14.8007	0.0262	0.3421	0.3599	0.2217	224	0.0372
Ca	420.382	4198	27.1325	411.082	9.3003	8.8003	9.8003	0.133	4.5902	4.8285	2.9011	554	0.2282
Ti	66.8648	1337	0.5593	8.4732	58.3915	67.2149	48.3077	0.0005	0.0196	0.0206	0.0104	202	0.0174
Fe	216.755	4332	13.18	199.689	17.0657	19.5013	14.9007	0.0205	2.4081	2.5331	1.0923	569	0.1262
Y	507.749	10138	27.3742	414.743	93.0064	88.726	96.4307	0.0285	1.8489	1.9449	0.5268	490	0.0784
Zr	921.846	18381	58.5918	887.719	34.127	37.7047	28.4027	0.1751	9.8898	10.403	2.7464	743	0.251
Nb	5.9001	118	0.2244	3.4001	2.5	3.6	3.5	0.0024	0.3415	0.3593	0.0931	1840	0.1955
Ce	58.8114	1176	2.62	39.6948	19.1166	21.7016	17.501	0.0207	1.4524	1.5277	0.2626	1828	0.2201
Mn	154.979	3098	9.3461	141.602	13.3775	13.3006	13.5006	0.0491	1.8774	1.9748	0.8657	555	0.1218
Hf	123.05	2460	2.7541	41.7278	81.3222	91.7278	70.9166	0.002	0.2898	0.3048	0.0411	714	0.0668
La	31.1032	622	0.9033	13.6855	17.4177	19.4012	16.0008	0.0069	0.4846	0.5098	0.0884	1689	0.1656
Nd	25.6688	770	0.9954	15.0818	10.587	10.4004	10.8004	0.0134	0.962	1.0119	0.1689	1937	0.2123
O									37.1232	39.0498	58.7743
Total									95.0664	100	100
Formula	Oxide
Na2O	14.2091
Al2O3	0.364
SiO2	47.8274
Cl	0.3471
K2O	0.4121
CaO	6.4227
TiO2	0.0327
FeO	3.0981
Y2O3	2.348
ZrO2	13.3591
Nb2O5	0.4886
Ce2O3	1.7011
MnO	2.4242
HfO2	0.3417
La2O3	0.5684
Nd2O3	1.1221
Total	95.0664
	20 / 1 . X = -19991. Y = -3419. Z = 5.
Na	2388.89	23702	153.238	2321.69	67.1996	71.0166	64.8139	1.0927	10.374	11.0261	11.4995	591	0.3966
Al	154.329	3085	5.7554	87.1993	67.1292	71.4168	61.4125	0.0024	0.1439	0.1529	0.1359	154	0.0165
Si	7753.12	75597	507.673	7691.7	61.4129	73.2177	49.6081	0.8959	22.4243	23.8339	20.3472	369	0.2951
Cl	61.5625	1231	3.6772	55.7124	5.8501	6.2001	5.5001	0.0969	0.4107	0.4366	0.2952	205	0.0453
K	103.836	1038	5.6858	86.1445	17.691	19.4012	15.6008	0.0224	0.292	0.3104	0.1903	231	0.0355
Ca	446.256	4456	28.6752	434.456	11.8005	12.4005	11.2004	0.1405	4.853	5.158	3.0857	623	0.2361
Ti	89.2263	1784	2.169	32.8624	56.3639	60.6121	51.5088	0.0021	0.0762	0.081	0.0405	199	0.0188
Fe	212.399	4245	12.8541	194.751	17.6481	19.5013	16.0008	0.02	2.3536	2.5015	1.074	580	0.1253
Y	626.041	12495	35.338	535.402	90.6384	83.523	96.3306	0.0367	2.3929	2.5434	0.6859	485	0.0879
Zr	808.954	16136	51.2316	776.204	32.7497	35.9043	27.7025	0.1531	8.6656	9.2103	2.4209	729	0.2336
Nb	6.3501	127	0.2541	3.8501	2.5	3.3	2.9	0.0027	0.389	0.4135	0.1067	1851	0.2019
Ce	58.8114	1176	2.7266	41.3104	17.501	18.3011	17.001	0.0216	1.5144	1.6096	0.2754	1753	0.2185
Mn	143.568	2870	8.628	130.721	12.8467	13.5006	11.8005	0.0454	1.7367	1.8459	0.8056	545	0.1172
Hf	114.593	2291	1.8592	28.1683	86.425	97.4313	75.4188	0.0014	0.1956	0.2079	0.0279	736	0.0662
La	31.3532	627	0.9484	14.369	16.9843	17.8011	16.4009	0.0073	0.5098	0.5418	0.0935	1671	0.1657
Nd	25.3021	759	0.8876	13.4483	11.8538	12.1338	11.5338	0.0119	0.8595	0.9135	0.1519	2053	0.2149
O									36.8945	39.2137	58.7639
Total									94.0856	100	100
Formula	Oxide
Na2O	13.984
Al2O3	0.2719
SiO2	47.9739
Cl	0.4107
K2O	0.3518
CaO	6.7903
TiO2	0.1271
FeO	3.0278
Y2O3	3.0389
ZrO2	11.7054
Nb2O5	0.5565
Ce2O3	1.7737
MnO	2.2425
HfO2	0.2307
La2O3	0.5979
Nd2O3	1.0025
Total	94.0856
	21 / 1 . X = -19887. Y = -2877. Z = 5.
Na	2370.2	23518	151.713	2298.81	71.3861	72.6174	70.6165	1.0818	10.3077	11.0161	11.5676	612	0.3948
Al	130.306	2605	4.0383	61.1901	69.116	76.0191	59.9118	0.0017	0.1011	0.1081	0.0967	157	0.0157
Si	7534.39	73516	493.306	7474.77	59.6125	75.0186	44.2065	0.8706	21.8265	23.3264	20.0502	364	0.2901
Cl	64.4137	1288	3.799	57.5635	6.8502	6.8002	6.9002	0.1001	0.4236	0.4527	0.3082	221	0.0465
K	123.65	1236	6.9599	105.459	18.1911	17.201	19.4012	0.0274	0.3568	0.3813	0.2355	234	0.0382
Ca	454.18	4535	29.3141	444.179	10.0003	10.4004	9.6003	0.1437	4.9528	5.2932	3.1882	573	0.2375
Ti	79.9211	1598	1.4957	22.6635	57.2576	61.4125	52.5091	0.0015	0.0524	0.056	0.0282	200	0.0182
Fe	204.939	4096	12.3655	187.367	17.5716	19.9013	15.5008	0.0193	2.2594	2.4146	1.0438	578	0.1229
Y	592.255	11822	32.7849	496.77	95.4856	95.4301	95.5301	0.0341	2.2127	2.3648	0.6421	496	0.0851
Zr	793.472	15828	50.2114	760.822	32.6497	35.3041	28.4027	0.15	8.467	9.0488	2.3947	726	0.2304
Nb	10.9504	219	0.5577	8.4504	2.5	4.3001	1.8	0.0059	0.8505	0.9089	0.2362	1844	0.2484
Ce	59.6617	1193	2.753	41.7145	17.9472	20.9014	16.1009	0.0218	1.526	1.6309	0.281	1771	0.22
Mn	164.639	3291	10.0538	152.339	12.3005	12.3005	12.3005	0.0529	2.0201	2.1589	0.9487	532	0.1256
Hf	127.504	2549	2.8464	43.1297	84.3739	95.9304	72.8175	0.0021	0.2997	0.3203	0.0433	728	0.0681
La	36.9045	738	1.3614	20.6286	16.2759	18.2011	14.9007	0.0104	0.7305	0.7807	0.1357	1633	0.1736
Nd	24.1686	725	0.8356	12.6615	11.5071	11.1337	11.9338	0.0112	0.8075	0.863	0.1444	2019	0.2101
O									36.3755	38.8753	58.6555
Total									93.5699	100	100
Formula	Oxide
Na2O	13.8946
Al2O3	0.1911
SiO2	46.695
Cl	0.4236
K2O	0.4298
CaO	6.93
TiO2	0.0875
FeO	2.9067
Y2O3	2.8101
ZrO2	11.4372
Nb2O5	1.2166
Ce2O3	1.7874
MnO	2.6084
HfO2	0.3534
La2O3	0.8567
Nd2O3	0.9419
Total	93.5699
	22 / 1 . X = -19274. Y = -3523. Z = 6.
Na	2401.38	23825	153.749	2329.44	71.9402	70.2163	73.0176	1.0963	10.4142	11.1421	11.671	612	0.3981
Al	152.226	3043	5.3572	81.1668	71.0597	76.7194	63.5133	0.0022	0.1341	0.1435	0.1281	159	0.0166
Si	7582.6	73975	496.458	7521.79	60.8135	80.8216	40.8055	0.8761	21.9666	23.502	20.1511	368	0.2913
Cl	59.3116	1186	3.4197	51.8114	7.5002	7.3002	7.7002	0.0901	0.3817	0.4084	0.2774	231	0.0445
K	139.464	1394	8.0268	121.613	17.8511	17.401	18.4011	0.0316	0.4119	0.4407	0.2714	232	0.0403
Ca	439.737	4391	28.2582	428.137	11.6004	12.2005	11.0004	0.1385	4.7787	5.1127	3.0719	617	0.234
Ti	71.717	1434	0.7871	11.925	59.792	66.5146	52.109	0.0008	0.0276	0.0295	0.0148	204	0.0178
Fe	196.527	3928	11.8166	179.032	17.4951	19.4012	15.8008	0.0184	2.1603	2.3113	0.9966	577	0.1205
Y	608.871	12153	33.9824	514.864	94.007	87.7254	99.0324	0.0353	2.297	2.4575	0.6656	493	0.0865
Zr	803.424	16026	50.8991	771.167	32.2573	34.604	28.5027	0.1521	8.5956	9.1964	2.4277	723	0.2323
Nb	8.9003	178	0.4224	6.4003	2.5	3.4	2.6	0.0044	0.6454	0.6905	0.179	1847	0.2289
Ce	60.4621	1209	2.8239	42.7841	17.678	18.6011	17.101	0.0223	1.5665	1.6759	0.288	1759	0.2211
Mn	153.478	3068	9.3221	141.239	12.239	12.2005	12.3005	0.049	1.8739	2.0049	0.8788	531	0.121
Hf	121.899	2437	2.5098	38.0253	83.8737	96.0304	71.717	0.0018	0.2643	0.2828	0.0382	726	0.0671
La	35.6542	713	1.1547	17.4948	18.1594	18.1011	18.2011	0.0089	0.6199	0.6633	0.115	1726	0.1746
Nd	25.2688	758	0.9283	14.0639	11.2049	11.2671	11.1337	0.0125	0.8975	0.9602	0.1603	1993	0.2128
O									36.4319	38.9783	58.6651
Total									93.4672	100	100
Formula	Oxide
Na2O	14.0382
Al2O3	0.2534
SiO2	46.9949
Cl	0.3817
K2O	0.4962
CaO	6.6864
TiO2	0.046
FeO	2.7792
Y2O3	2.917
ZrO2	11.6109
Nb2O5	0.9232
Ce2O3	1.8348
MnO	2.4197
HfO2	0.3117
La2O3	0.727
Nd2O3	1.0468
Total	93.4672
	23 / 1 . X = -18772. Y = -2887. Z = 6.
Na	2390.82	23721	152.894	2316.49	74.3259	76.4193	73.0176	1.0902	10.3392	11.0849	11.6211	621	0.3957
Al	130.906	2617	4.0548	61.4334	69.4732	74.0181	63.4133	0.0017	0.1013	0.1086	0.097	157	0.0157
Si	7573.99	73893	495.771	7511.38	62.6134	75.0186	50.2083	0.8749	21.8824	23.4606	20.1328	372	0.2904
Cl	67.365	1347	3.9578	59.9648	7.4002	7.2002	7.6002	0.1043	0.4421	0.474	0.3223	230	0.0479
K	104.636	1046	5.429	82.2545	22.3817	22.2016	22.6017	0.0214	0.2787	0.2988	0.1842	259	0.0362
Ca	439.938	4393	28.3176	429.037	10.9004	12.4005	9.4003	0.1388	4.7887	5.134	3.0873	599	0.234
Ti	98.7322	1974	2.7432	41.5612	57.1709	62.9131	50.6085	0.0027	0.0962	0.1032	0.0519	200	0.0194
Fe	192.773	3853	11.5482	174.966	17.8069	17.701	17.9011	0.018	2.1108	2.263	0.9766	582	0.1194
Y	696.095	13890	39.5912	599.842	96.2528	98.0317	94.8297	0.0412	2.6708	2.8634	0.7762	498	0.0931
Zr	801.012	15978	50.6728	767.739	33.273	37.0045	27.3025	0.1514	8.5416	9.1576	2.4196	733	0.2316
Nb	8.9003	178	0.4224	6.4003	2.5	3.2	3.3	0.0044	0.646	0.6926	0.1797	1849	0.2291
Ce	55.4602	1109	2.5293	38.3207	17.1394	18.8012	16.1009	0.02	1.4029	1.504	0.2587	1732	0.2125
Mn	155.28	3104	9.4446	143.094	12.1851	12.3005	12.0005	0.0496	1.8984	2.0353	0.8929	530	0.1218
Hf	120.798	2415	2.1763	32.9721	87.826	100.734	74.9185	0.0016	0.2287	0.2452	0.0331	741	0.0673
La	35.0541	701	1.2823	19.4283	15.6258	15.8008	15.5008	0.0098	0.6885	0.7381	0.1281	1601	0.1695
Nd	24.2353	727	0.8427	12.7682	11.4671	11.4671	11.4671	0.0113	0.8148	0.8736	0.146	2017	0.2103
O									36.342	38.963	58.6925
Total									93.273	100	100
Formula	Oxide
Na2O	13.9371
Al2O3	0.1914
SiO2	46.8145
Cl	0.4421
K2O	0.3358
CaO	6.7003
TiO2	0.1605
FeO	2.7155
Y2O3	3.3918
ZrO2	11.538
Nb2O5	0.9242
Ce2O3	1.6432
MnO	2.4512
HfO2	0.2697
La2O3	0.8074
Nd2O3	0.9504
Total	93.273
	24 / 1 . X = -17962. Y = -2643. Z = 9.
Na	2352.22	23341	150.917	2286.97	65.2448	68.8156	63.0131	1.0761	10.2667	10.8844	11.4524	585	0.3933
Al	140.865	2816	4.8573	73.6076	67.2578	71.1167	62.1127	0.002	0.1217	0.129	0.1157	155	0.016
Si	7598.26	74124	497.301	7536.05	62.2135	77.2197	47.2074	0.8776	21.9923	23.3155	20.0813	372	0.2915
Cl	64.7138	1294	3.8151	57.8137	6.9002	6.8002	7.0002	0.1005	0.4255	0.451	0.3078	222	0.0467
K	126.953	1269	7.222	109.442	17.511	17.601	17.401	0.0284	0.3702	0.3924	0.2428	229	0.0386
Ca	446.256	4456	28.7092	435.056	11.2004	12.8005	9.6003	0.1407	4.8478	5.1395	3.1019	606	0.2354
Ti	96.1805	1923	2.3784	36.0417	60.1388	67.515	51.7088	0.0023	0.0833	0.0883	0.0446	204	0.0194
Fe	205.339	4104	12.4458	188.603	16.7362	17.001	16.5009	0.0194	2.2724	2.4092	1.0435	563	0.1227
Y	639.095	12755	35.866	543.509	95.5857	95.5301	95.6302	0.0373	2.4201	2.5657	0.6981	497	0.0887
Zr	815.288	16262	51.4459	779.606	35.6812	40.1053	28.6027	0.1537	8.6713	9.193	2.4378	758	0.234
Nb	8.9503	179	0.4257	6.4503	2.5	4.2001	2.7	0.0045	0.6497	0.6888	0.1793	1845	0.2292
Ce	62.3128	1246	2.8495	43.1808	19.132	18.7012	19.4012	0.0225	1.5781	1.6731	0.2888	1827	0.2252
Mn	166.542	3329	10.1727	154.156	12.3851	13.0006	11.4004	0.0535	2.0422	2.1651	0.9533	533	0.1262
Hf	123.901	2477	2.44	36.9753	86.9254	98.432	75.4188	0.0018	0.257	0.2725	0.0369	739	0.0679
La	36.7545	735	1.2733	19.2951	17.4593	18.8012	16.5009	0.0098	0.6825	0.7235	0.126	1689	0.175
Nd	26.0356	781	1.0514	15.933	10.1026	10.6004	9.5336	0.0142	1.0152	1.0763	0.1805	1890	0.212
O									36.6289	38.8327	58.7094
Total									94.3249	100	100
Formula	Oxide
Na2O	13.8393
Al2O3	0.2299
SiO2	47.0498
Cl	0.4255
K2O	0.4459
CaO	6.7831
TiO2	0.1389
FeO	2.9235
Y2O3	3.0734
ZrO2	11.7132
Nb2O5	0.9294
Ce2O3	1.8484
MnO	2.637
HfO2	0.3031
La2O3	0.8004
Nd2O3	1.1842
Total	94.3249
	25 / 1 . X = -17966. Y = -3188. Z = 9.
Na	2354.25	23361	150.377	2278.35	75.8959	76.0191	75.819	1.0723	10.1555	10.9915	11.4744	627	0.3897
Al	133.259	2664	4.2355	64.1713	69.0873	73.1176	63.7134	0.0017	0.1056	0.1142	0.1016	156	0.0157
Si	7596.79	74110	497.216	7533.27	63.5143	80.4213	46.6072	0.8775	21.9313	23.7368	20.2837	375	0.2908
Cl	70.1162	1402	4.2384	64.2161	5.9001	5.4001	6.4001	0.1117	0.4737	0.5127	0.3471	206	0.049
K	103.535	1035	5.489	83.164	20.3714	21.0015	19.6013	0.0216	0.2821	0.3053	0.1874	248	0.0358
Ca	442.445	4418	28.5689	432.845	9.6003	9.8003	9.4003	0.14	4.8383	5.2366	3.1357	563	0.2348
Ti	89.2763	1785	2.3118	35.0265	54.2498	59.0115	48.8079	0.0023	0.0813	0.088	0.0441	195	0.0187
Fe	188.517	3768	11.2165	169.94	18.5776	19.0012	18.2011	0.0175	2.0531	2.2221	0.9549	595	0.1185
Y	649.338	12959	36.8383	558.133	91.2052	89.4264	92.6283	0.0383	2.4888	2.6937	0.7271	486	0.0896
Zr	784.677	15653	49.6434	752.142	32.5343	36.3044	26.5023	0.1483	8.382	9.0721	2.3868	726	0.2293
Nb	9.4003	188	0.4554	6.9003	2.5	2.7	2.4	0.0048	0.6967	0.7541	0.1948	1850	0.2342
Ce	52.7592	1055	2.32	35.1505	17.6087	19.7013	16.3009	0.0183	1.289	1.3951	0.2389	1758	0.2092
Mn	155.23	3103	9.3982	142.391	12.839	12.3005	13.7006	0.0494	1.8918	2.0475	0.8945	544	0.1221
Hf	118.997	2379	2.3579	35.7236	83.2731	91.7278	74.8185	0.0017	0.2473	0.2677	0.036	721	0.0662
La	31.4033	628	0.9863	14.944	16.4592	17.101	16.0008	0.0076	0.5304	0.5741	0.0992	1646	0.1649
Nd	22.7017	681	0.7788	11.7991	10.9026	11.8671	9.8003	0.0105	0.7542	0.8163	0.1358	1970	0.2042
O									36.1928	39.1724	58.7581
Total									92.3937	100	100
Formula	Oxide
Na2O	13.6893
Al2O3	0.1994
SiO2	46.9193
Cl	0.4737
K2O	0.3398
CaO	6.7697
TiO2	0.1356
FeO	2.6413
Y2O3	3.1606
ZrO2	11.3224
Nb2O5	0.9967
Ce2O3	1.5097
MnO	2.4427
HfO2	0.2916
La2O3	0.6221
Nd2O3	0.8797
Total	92.3937
	26 / 1 . X = -19905. Y = -4958. Z = 9.
Na	2200.77	21849	140.969	2136.01	64.7523	68.8156	62.2128	1.0052	9.6133	10.251	10.7969	585	0.3721
Al	133.208	2663	4.5477	68.9091	64.2994	67.8152	59.6117	0.0019	0.1135	0.121	0.1086	151	0.0155
Si	7666.58	74774	501.832	7603.96	62.6141	81.0217	44.2065	0.8856	22.1274	23.5953	20.3427	372	0.2924
Cl	66.4646	1329	3.931	59.5644	6.9002	6.8002	7.0002	0.1036	0.4386	0.4677	0.3194	222	0.0474
K	161.586	1615	9.3434	141.575	20.0114	22.8017	16.6009	0.0368	0.4791	0.5109	0.3164	245	0.0433
Ca	434.623	4340	27.9838	424.022	10.6004	9.0003	12.2005	0.1372	4.7278	5.0414	3.0457	590	0.2322
Ti	92.128	1842	2.2806	34.5569	57.5711	63.3132	51.0086	0.0022	0.0799	0.0852	0.043	200	0.019
Fe	188.117	3760	11.3171	171.481	16.6362	18.7012	14.8007	0.0176	2.0661	2.2032	0.9552	562	0.1176
Y	598.429	11945	32.8996	498.508	99.9218	98.532	101.034	0.0342	2.2186	2.3658	0.6443	507	0.0856
Zr	829.364	16542	52.6334	797.522	31.8418	34.3039	27.9026	0.1573	8.8696	9.458	2.5106	716	0.2359
Nb	9.6503	193	0.4719	7.1503	2.5	3.1	3.9001	0.005	0.719	0.7667	0.1998	1842	0.2358
Ce	62.713	1254	2.998	45.4274	17.2856	17.101	17.401	0.0237	1.6604	1.7705	0.306	1737	0.2237
Mn	186.965	3737	11.4485	173.472	13.4929	14.3007	12.2005	0.0602	2.2985	2.451	1.0803	557	0.1346
Hf	121.599	2431	2.2223	33.673	87.9258	96.5307	79.3208	0.0016	0.2333	0.2488	0.0338	741	0.0674
La	35.8542	717	1.1722	17.7615	18.0928	20.6014	16.3009	0.009	0.6283	0.67	0.1168	1719	0.1745
Nd	25.2021	756	0.971	14.7128	10.4893	11.2671	9.6003	0.0131	0.9375	0.9997	0.1678	1926	0.2104
O									36.5683	38.9941	59.0128
Total									93.7791	100	100
Formula	Oxide
Na2O	12.9585
Al2O3	0.2144
SiO2	47.3388
Cl	0.4386
K2O	0.5771
CaO	6.6151
TiO2	0.1332
FeO	2.658
Y2O3	2.8176
ZrO2	11.981
Nb2O5	1.0286
Ce2O3	1.9448
MnO	2.9679
HfO2	0.2751
La2O3	0.7368
Nd2O3	1.0935
Total	93.7791
	27 / 1 . X = -19814. Y = -5681. Z = 9.
Na	2298.4	22811	147.32	2232.03	66.3684	65.014	67.2149	1.0505	9.9763	10.646	11.1407	588	0.3836
Al	164.339	3285	6.3265	95.852	68.487	74.0181	61.1123	0.0026	0.1576	0.1682	0.15	155	0.0169
Si	7743.86	75509	506.805	7678.55	65.3149	80.6214	50.0083	0.8944	22.3447	23.8447	20.4254	380	0.2943
Cl	60.0619	1201	3.4593	52.4117	7.6502	8.3002	7.0002	0.0912	0.3868	0.4128	0.2801	234	0.0449
K	157.181	1571	9.1388	138.46	18.7212	19.8013	17.401	0.036	0.4696	0.5011	0.3083	238	0.0427
Ca	415.168	4146	26.7752	405.668	9.5003	10.2003	8.8003	0.1312	4.5326	4.8369	2.9033	560	0.2269
Ti	93.1286	1862	2.4495	37.1115	56.0171	61.7126	49.5081	0.0024	0.086	0.0917	0.0461	198	0.019
Fe	194.325	3884	11.6238	176.112	18.2129	18.0011	18.4011	0.0181	2.1255	2.2681	0.9771	589	0.1201
Y	581.413	11606	32.2692	488.907	92.5061	86.7248	97.1311	0.0336	2.181	2.3274	0.6298	489	0.0843
Zr	854.503	17042	54.2836	822.446	32.0573	34.4039	28.3026	0.1622	9.1692	9.7847	2.5806	721	0.2405
Nb	6.9502	139	0.2937	4.4502	2.5	3.8	3.3	0.0031	0.4483	0.4784	0.1239	1846	0.208
Ce	56.3105	1126	2.59	39.2403	17.0702	19.9013	15.3008	0.0205	1.437	1.5334	0.2633	1729	0.2139
Mn	161.936	3237	9.7317	147.444	14.493	16.3009	11.6004	0.0512	1.9567	2.088	0.9144	578	0.1251
Hf	119.447	2388	2.2687	34.3729	85.0742	95.2299	74.9185	0.0016	0.2381	0.2541	0.0342	729	0.0666
La	31.4033	628	1.0122	15.3357	16.0675	17.001	15.4008	0.0078	0.5435	0.58	0.1005	1624	0.164
Nd	24.802	744	0.9423	14.2772	10.5248	11.3338	9.6003	0.0127	0.9114	0.9726	0.1622	1933	0.2096
O									36.7452	39.2118	58.9602
Total									93.7095	100	100
Formula	Oxide
Na2O	13.4479
Al2O3	0.2979
SiO2	47.8037
Cl	0.3868
K2O	0.5657
CaO	6.342
TiO2	0.1434
FeO	2.7344
Y2O3	2.7698
ZrO2	12.3858
Nb2O5	0.6414
Ce2O3	1.6831
MnO	2.5265
HfO2	0.2808
La2O3	0.6374
Nd2O3	1.0631
Total	93.7095
	28 / 1 . X = -19207. Y = -5165. Z = 9.
Na	2208.89	21929	141.552	2144.64	64.2445	69.4159	61.0123	1.0094	9.6099	10.3	10.802	580	0.3717
Al	134.76	2694	4.4091	66.8017	67.9582	71.817	62.813	0.0018	0.1097	0.1175	0.105	154	0.0157
Si	7690.76	75004	503.517	7628.74	62.0136	79.0206	45.0067	0.8886	22.1669	23.7585	20.3958	369	0.2926
Cl	80.3213	1606	4.8031	72.7711	7.5502	7.5002	7.6002	0.1266	0.536	0.5745	0.3907	232	0.0532
K	168.794	1687	9.8412	149.103	19.6913	21.4015	17.601	0.0388	0.5052	0.5414	0.3339	243	0.0441
Ca	453.879	4532	29.35	444.678	9.2003	10.4004	8.0002	0.1439	4.9673	5.324	3.2027	551	0.2377
Ti	93.3287	1866	2.5916	39.2656	54.0631	59.7118	47.6075	0.0025	0.091	0.0975	0.0491	194	0.0189
Fe	185.714	3712	11.1367	168.73	16.9833	18.2011	15.9008	0.0173	2.0365	2.1828	0.9423	568	0.1172
Y	654.209	13056	37.0072	560.692	93.5178	89.6265	96.6308	0.0385	2.4968	2.6761	0.7257	491	0.0899
Zr	793.422	15827	50.1521	759.849	33.573	36.8045	28.4027	0.1499	8.4549	9.062	2.3952	736	0.2304
Nb	9.2503	185	0.4455	6.7503	2.5	3	3.2	0.0047	0.6806	0.7295	0.1893	1847	0.2324
Ce	54.7099	1094	2.3427	35.4933	19.2166	21.0015	18.1011	0.0185	1.3004	1.3937	0.2398	1835	0.2141
Mn	169.645	3391	10.3232	156.406	13.2391	14.7007	10.9004	0.0543	2.0761	2.2252	0.9766	552	0.1279
Hf	123.15	2462	2.4537	37.1752	85.9749	98.0317	73.918	0.0018	0.2569	0.2754	0.0372	731	0.0672
La	34.2039	684	1.1233	17.0196	17.1843	18.0011	16.6009	0.0086	0.6035	0.6469	0.1123	1680	0.1708
Nd	24.702	741	0.9478	14.3594	10.3426	10.9337	9.667	0.0128	0.917	0.9828	0.1643	1917	0.2089
O									36.4918	39.1121	58.9381
Total									93.3006	100	100
Formula	Oxide
Na2O	12.954
Al2O3	0.2072
SiO2	47.4232
Cl	0.536
K2O	0.6085
CaO	6.9502
TiO2	0.1518
FeO	2.62
Y2O3	3.1708
ZrO2	11.4209
Nb2O5	0.9737
Ce2O3	1.5231
MnO	2.6808
HfO2	0.303
La2O3	0.7078
Nd2O3	1.0696
Total	93.3006
	29 / 1 . X = -18966. Y = -5952. Z = 8.
Na	2232.32	22160	142.695	2161.95	70.3702	72.2172	69.2158	1.0175	9.6879	10.4962	10.9653	607	0.3746
Al	142.867	2856	5.231	79.2539	63.6134	66.9148	59.2116	0.0022	0.1304	0.1412	0.1257	150	0.0159
Si	7667.84	74786	501.919	7604.52	63.3141	79.4208	47.2074	0.8858	22.1275	23.9738	20.5012	374	0.2924
Cl	65.5142	1310	3.8885	58.914	6.6001	6.2001	7.0002	0.1025	0.4341	0.4703	0.3186	217	0.047
K	175.001	1749	10.3756	157.2	17.8011	17.8011	17.8011	0.0409	0.5328	0.5772	0.3546	232	0.0446
Ca	436.829	4362	28.0398	424.828	12.0005	10.8004	13.2006	0.1374	4.7479	5.1441	3.0825	628	0.2336
Ti	102.835	2056	3.0285	45.884	56.9509	63.8134	49.108	0.003	0.1064	0.1153	0.0578	200	0.0197
Fe	192.122	3840	11.621	176.068	16.0538	17.8011	14.5007	0.0181	2.1278	2.3053	0.9914	553	0.119
Y	624.183	12458	34.8521	528.041	96.1417	89.0262	101.834	0.0362	2.3574	2.5541	0.69	499	0.0878
Zr	799.504	15948	50.6561	767.485	32.0188	33.9038	29.0028	0.1514	8.5635	9.278	2.4428	721	0.2319
Nb	6.3001	126	0.2508	3.8001	2.5	4.5001	3.3	0.0026	0.3836	0.4156	0.1074	1849	0.2011
Ce	59.7118	1194	2.7393	41.503	18.2088	20.3014	16.9009	0.0217	1.5218	1.6488	0.2826	1788	0.2208
Mn	152.627	3051	9.1517	138.657	13.9699	14.7007	12.8005	0.0481	1.8424	1.9962	0.8727	568	0.1213
Hf	107.989	2159	1.3869	21.0129	86.9756	101.034	72.9175	0.001	0.1455	0.1577	0.0212	737	0.0649
La	32.5035	650	0.9732	14.7441	17.7594	17.701	17.8011	0.0075	0.5232	0.5669	0.098	1709	0.169
Nd	24.3353	730	0.8531	12.926	11.4093	12.0005	10.7337	0.0115	0.8262	0.8951	0.149	2015	0.2108
O									36.2405	39.2643	58.9391
Total									92.2988	100	100
Formula	Oxide
Na2O	13.0591
Al2O3	0.2463
SiO2	47.339
Cl	0.4341
K2O	0.6418
CaO	6.6433
TiO2	0.1775
FeO	2.7374
Y2O3	2.9937
ZrO2	11.5676
Nb2O5	0.5487
Ce2O3	1.7824
MnO	2.379
HfO2	0.1716
La2O3	0.6136
Nd2O3	0.9636
Total	92.2988
	30 / 1 . X = -19354. Y = -6583. Z = 10.
Na	2253.03	22364	144.391	2187.88	65.1526	72.4173	60.6121	1.0296	9.8021	10.4643	10.9321	584	0.378
Al	161.236	3223	6.2427	94.5925	66.6433	70.7165	61.2124	0.0026	0.1554	0.1658	0.1476	153	0.0167
Si	7796.04	76005	510.139	7729.82	66.2156	84.8237	47.6075	0.9003	22.4816	24.0003	20.524	382	0.2955
Cl	63.0631	1261	3.6867	55.863	7.2002	7.5002	6.9002	0.0972	0.4122	0.44	0.2981	227	0.0461
K	157.682	1576	9.0824	137.621	20.0613	18.8012	21.6015	0.0358	0.4668	0.4984	0.3061	246	0.0429
Ca	416.572	4160	26.753	405.372	11.2004	11.0004	11.4004	0.1311	4.5309	4.837	2.8985	608	0.2277
Ti	89.2763	1785	2.1954	33.2658	56.0105	61.6125	49.6081	0.0022	0.0771	0.0823	0.0413	198	0.0187
Fe	213.55	4268	13.1229	198.844	14.7066	16.4009	13.2006	0.0204	2.4009	2.5631	1.1023	529	0.1249
Y	603.5	12046	33.6018	509.148	94.3518	86.6248	100.533	0.0349	2.2735	2.427	0.6557	495	0.0862
Zr	833.587	16626	52.8618	800.983	32.6036	36.6044	26.2023	0.1579	8.9366	9.5403	2.5119	727	0.2374
Nb	6.4001	128	0.2574	3.9001	2.5	2.6	3.8	0.0027	0.3935	0.4201	0.1086	1848	0.2021
Ce	52.259	1045	2.1294	32.2654	19.9936	20.3014	19.8013	0.0168	1.1816	1.2614	0.2162	1871	0.2112
Mn	170.296	3404	10.3144	156.287	14.0083	14.7007	12.9006	0.0542	2.0747	2.2148	0.9683	568	0.1284
Hf	127.153	2542	2.5393	38.477	88.6763	99.1324	78.2202	0.0018	0.2662	0.2842	0.0382	743	0.0684
La	28.8528	577	0.8757	13.2686	15.5842	17.8011	14.0007	0.0067	0.4703	0.502	0.0868	1599	0.1587
Nd	25.1354	754	0.9634	14.5973	10.5382	11.0671	9.9337	0.013	0.9324	0.9954	0.1657	1935	0.2108
O									36.8165	39.3035	58.9986
Total									93.6722	100	100
Formula	Oxide
Na2O	13.213
Al2O3	0.2935
SiO2	48.0966
Cl	0.4122
K2O	0.5623
CaO	6.3397
TiO2	0.1286
FeO	3.0887
Y2O3	2.8872
ZrO2	12.0715
Nb2O5	0.5629
Ce2O3	1.384
MnO	2.6789
HfO2	0.3139
La2O3	0.5515
Nd2O3	1.0876
Total	93.6722
	31 / 1 . X = -18349. Y = -6234. Z = 10.
Na	2208.48	21925	141.277	2140.68	67.7998	68.4154	67.415	1.0074	9.6015	10.3852	10.9131	596	0.3717
Al	134.91	2697	4.4789	67.8666	67.0435	70.8165	62.0127	0.0018	0.1116	0.1207	0.1081	154	0.0157
Si	7582.29	73972	496.038	7516.17	66.1153	82.8226	49.4081	0.8754	21.8635	23.6481	20.3415	382	0.2902
Cl	69.516	1390	4.2116	63.8158	5.7001	5.8001	5.6001	0.111	0.4701	0.5085	0.3465	202	0.0486
K	157.982	1579	9.0693	137.421	20.5614	22.0016	18.8012	0.0357	0.4654	0.5034	0.311	249	0.0429
Ca	435.425	4348	28.05	425.024	10.4004	11.6004	9.2003	0.1375	4.7436	5.1308	3.0926	585	0.2326
Ti	86.7248	1734	1.9289	29.2271	57.4977	62.9131	51.3087	0.0019	0.0676	0.0732	0.0369	200	0.0187
Fe	180.457	3607	10.7964	163.592	16.8657	18.4011	15.5008	0.0168	1.9726	2.1337	0.923	566	0.1154
Y	624.032	12455	34.8329	527.802	96.2306	92.2281	99.4326	0.0362	2.3489	2.5407	0.6904	498	0.0875
Zr	811.97	16196	51.2778	776.981	34.9887	38.1048	30.003	0.1532	8.6436	9.3491	2.476	751	0.2334
Nb	9.3503	187	0.4521	6.8503	2.5	3.8	3.3	0.0047	0.6897	0.746	0.194	1844	0.2331
Ce	61.2124	1224	2.7903	42.2804	18.932	18.5011	19.2012	0.0221	1.5472	1.6735	0.2885	1819	0.2236
Mn	175.902	3516	10.8057	163.732	12.1697	12.9006	11.0004	0.0568	2.1715	2.3488	1.0328	529	0.1301
Hf	119.047	2380	2.2949	34.773	84.2738	94.1292	74.4183	0.0017	0.2406	0.2602	0.0352	725	0.0663
La	36.4044	728	1.2288	18.62	17.7844	20.0013	16.2009	0.0094	0.6595	0.7134	0.1241	1707	0.1752
Nd	22.635	679	0.7884	11.9458	10.6893	10.067	11.4004	0.0106	0.762	0.8241	0.138	1946	0.203
O									36.0947	39.0409	58.9482
Total									92.4535	100	100
Formula	Oxide
Na2O	12.9426
Al2O3	0.2108
SiO2	46.7741
Cl	0.4701
K2O	0.5606
CaO	6.6373
TiO2	0.1128
FeO	2.5378
Y2O3	2.983
ZrO2	11.6757
Nb2O5	0.9866
Ce2O3	1.8122
MnO	2.8039
HfO2	0.2837
La2O3	0.7735
Nd2O3	0.8887
Total	92.4535
	32 / 1 . X = -17754. Y = -7050. Z = 13.
Na	2230.19	22139	143.194	2169.74	60.4583	65.014	57.611	1.0211	9.7151	10.4526	10.9222	562	0.3749
Al	142.667	2852	5.0144	75.9809	66.6863	72.5174	58.9115	0.0021	0.1248	0.1343	0.1195	153	0.016
Si	7735.24	75427	506.529	7675.12	60.1124	72.6174	47.6075	0.8939	22.321	24.0152	20.5413	364	0.2939
Cl	69.666	1393	4.2116	63.8159	5.8501	6.0001	5.7001	0.111	0.4703	0.506	0.3429	205	0.0487
K	183.711	1836	10.9732	166.27	17.441	17.8011	17.001	0.0432	0.5637	0.6065	0.3726	229	0.0456
Ca	425.998	4254	27.3354	414.197	11.8005	10.0003	13.6006	0.134	4.6295	4.981	2.9854	623	0.2305
Ti	105.587	2111	3.1829	48.2291	57.3577	63.6134	50.2083	0.0031	0.1118	0.1203	0.0603	200	0.0199
Fe	190.019	3798	11.5102	174.406	15.6126	15.4008	15.8008	0.0179	2.1065	2.2664	0.9749	546	0.1182
Y	691.977	13808	39.8166	603.317	88.6593	86.3246	90.527	0.0414	2.6941	2.8986	0.7832	480	0.0929
Zr	784.476	15649	49.4836	749.795	34.6809	36.6044	31.6033	0.1479	8.3644	8.9993	2.37	750	0.2296
Nb	5.8001	116	0.2178	3.3001	2.5	4.0001	3	0.0023	0.334	0.3593	0.0929	1854	0.1957
Ce	54.91	1098	2.4587	37.2551	17.6549	17.101	18.0011	0.0194	1.3652	1.4688	0.2518	1760	0.2125
Mn	168.293	3364	10.299	156.054	12.239	11.7005	13.1006	0.0541	2.0724	2.2297	0.975	531	0.1272
Hf	119.397	2387	2.1628	32.7719	86.6251	96.931	76.3192	0.0016	0.2267	0.2439	0.0328	734	0.0668
La	28.5027	570	0.7382	11.185	17.3177	19.3012	15.9008	0.0057	0.3966	0.4267	0.0738	1686	0.1611
Nd	24.8687	746	1.0024	15.1884	9.6803	10.8004	8.4002	0.0135	0.9704	1.0441	0.1739	1856	0.2078
O									36.4785	39.2474	58.9273
Total									92.9451	100	100
Formula	Oxide
Na2O	13.0958
Al2O3	0.2358
SiO2	47.7529
Cl	0.4703
K2O	0.679
CaO	6.4777
TiO2	0.1865
FeO	2.71
Y2O3	3.4213
ZrO2	11.2986
Nb2O5	0.4777
Ce2O3	1.599
MnO	2.676
HfO2	0.2673
La2O3	0.4652
Nd2O3	1.1319
Total	92.9451
	33 / 1 . X = -18165. Y = -7211. Z = 13.
Na	2213.25	21972	141.756	2147.73	65.5219	69.2158	63.2132	1.0108	9.6178	10.3645	10.7988	585	0.372
Al	149.674	2992	5.384	81.5728	68.1011	72.5174	62.2128	0.0022	0.1339	0.1442	0.1281	154	0.0163
Si	7789.73	75945	509.99	7726.81	62.914	79.4208	46.4071	0.9	22.4573	24.2008	20.64	372	0.2951
Cl	59.9619	1199	3.4692	52.5617	7.4002	6.9002	7.9002	0.0914	0.3877	0.4178	0.2823	230	0.0448
K	160.285	1602	9.3178	141.173	19.1112	21.0015	16.8009	0.0367	0.4788	0.516	0.3161	240	0.0431
Ca	436.026	4354	28.0925	425.626	10.4004	11.4004	9.4003	0.1377	4.7602	5.1298	3.0657	586	0.2332
Ti	104.586	2091	3.2044	48.5489	56.0372	62.713	48.4077	0.0031	0.1127	0.1214	0.0607	198	0.0198
Fe	201.884	4035	12.1616	184.26	17.6246	19.9013	15.6008	0.0189	2.2281	2.4011	1.0298	580	0.1224
Y	630.559	12585	35.4631	537.297	93.2621	89.9267	95.9304	0.0369	2.4016	2.5881	0.6973	492	0.0883
Zr	807.144	16100	51.0923	774.094	33.0498	35.7042	28.8027	0.1527	8.6461	9.3174	2.4466	733	0.2335
Nb	5.0501	101	0.1683	2.5501	2.5	3.7	3.1	0.0018	0.2578	0.2778	0.0716	1852	0.1864
Ce	53.4594	1069	2.4607	37.2816	16.1778	17.9011	15.1008	0.0195	1.3677	1.4739	0.252	1687	0.2085
Mn	158.933	3177	9.7553	147.802	11.1312	11.4004	10.7004	0.0513	1.9651	2.1176	0.9233	508	0.1233
Hf	115.394	2307	1.9681	29.8192	85.5748	99.2325	71.9171	0.0014	0.2061	0.2221	0.0298	729	0.0659
La	27.6525	553	0.6909	10.4682	17.1843	18.7012	16.1009	0.0053	0.3717	0.4005	0.0691	1682	0.1596
Nd	23.7685	713	0.8298	12.5726	11.196	11.1337	11.2671	0.0112	0.8042	0.8666	0.1439	1997	0.2086
O									36.5989	39.4403	59.045
Total									92.7956	100	100
Formula	Oxide
Na2O	12.9646
Al2O3	0.2529
SiO2	48.0446
Cl	0.3877
K2O	0.5768
CaO	6.6605
TiO2	0.188
FeO	2.8664
Y2O3	3.0499
ZrO2	11.6792
Nb2O5	0.3687
Ce2O3	1.6019
MnO	2.5374
HfO2	0.2431
La2O3	0.4359
Nd2O3	0.938
Total	92.7956
	34 / 1 . X = -14996. Y = -8689. Z = 19.
Na	1943.99	19316	124.355	1884.09	59.9042	64.2136	57.2108	0.8867	8.5841	9.3134	9.8207	569	0.339
Al	123.701	2473	3.6942	55.9711	67.7294	69.3159	65.6142	0.0015	0.0923	0.1001	0.0899	155	0.0153
Si	7689.18	74989	503.334	7625.97	63.2139	78.2202	48.2077	0.8883	22.2616	24.1529	20.8478	375	0.2939
Cl	51.6088	1032	2.9971	45.4087	6.2001	5.5001	6.9002	0.079	0.3332	0.3615	0.2472	210	0.0408
K	209.945	2098	12.5355	189.924	20.0213	20.2014	19.8013	0.0494	0.641	0.6954	0.4312	244	0.0486
Ca	422.187	4216	27.1196	410.887	11.3004	12.2005	10.4004	0.1329	4.572	4.9604	3.0003	607	0.2283
Ti	92.5282	1850	2.3271	35.2572	57.2711	65.114	48.3077	0.0023	0.0812	0.0881	0.0446	199	0.0189
Fe	126.303	2525	7.1998	109.084	17.2186	16.9009	17.501	0.0112	1.3141	1.4258	0.6189	571	0.0978
Y	479.508	9575	25.5079	386.468	93.0398	86.9249	97.9316	0.0265	1.7289	1.8758	0.5115	492	0.0763
Zr	778.847	15537	49.1479	744.635	34.2117	39.4051	25.9022	0.1468	8.322	9.029	2.3995	746	0.2291
Nb	7.8502	157	0.3531	5.3502	2.5	3.3	2.5	0.0037	0.5383	0.5841	0.1524	1843	0.2175
Ce	70.8666	1417	3.3644	50.973	19.8936	21.8016	18.7012	0.0266	1.8606	2.0186	0.3492	1860	0.2384
Mn	275.4	5503	17.3196	262.407	12.9929	13.3006	12.5005	0.091	3.4779	3.7734	1.6651	546	0.1674
Hf	123.4	2467	2.9192	44.2291	79.1711	90.7272	67.6151	0.0021	0.3067	0.3328	0.0452	704	0.0665
La	43.1061	862	1.6724	25.3384	17.7677	18.0011	17.601	0.0128	0.8948	0.9708	0.1694	1701	0.1853
Nd	26.1689	785	1.0493	15.8975	10.2715	10.8004	9.667	0.0141	1.0127	1.0988	0.1847	1906	0.2128
O									36.148	39.2191	59.4225
Total									92.1693	100	100
Formula	Oxide
Na2O	11.5712
Al2O3	0.1743
SiO2	47.6259
Cl	0.3332
K2O	0.7721
CaO	6.3971
TiO2	0.1355
FeO	1.6906
Y2O3	2.1956
ZrO2	11.2413
Nb2O5	0.7701
Ce2O3	2.1793
MnO	4.4908
HfO2	0.3617
La2O3	1.0493
Nd2O3	1.1812
Total	92.1693
	35 / 1 . X = -14457. Y = -9164. Z = 22.
Na	1912.29	19003	122.741	1859.82	52.4706	53.2093	52.0089	0.8752	8.5127	9.165	9.6498	535	0.3365
Al	125.902	2517	4.1589	63.0178	62.8845	63.9135	61.5125	0.0017	0.1041	0.112	0.1005	149	0.0152
Si	7790.99	75957	510.208	7730.87	60.1131	78.8205	41.4057	0.9004	22.5571	24.2854	20.9309	365	0.2963
Cl	47.0073	940	2.637	39.9571	7.0502	8.1002	6.0001	0.0695	0.2929	0.3154	0.2153	223	0.0389
K	209.345	2092	12.7685	193.474	15.8708	17.401	14.0007	0.0503	0.6525	0.7025	0.4349	218	0.048
Ca	428.605	4280	27.6263	418.605	10.0003	10.0003	10.0003	0.1354	4.6561	5.0129	3.0275	572	0.2298
Ti	97.1311	1942	2.5531	38.6863	58.4449	66.6146	49.108	0.0025	0.0891	0.096	0.0485	201	0.0193
Fe	149.724	2993	8.7522	132.617	17.1069	17.9011	16.4009	0.0136	1.599	1.7215	0.7462	570	0.1058
Y	396.719	7924	20.1796	305.769	90.9495	88.2257	93.1286	0.021	1.3691	1.474	0.4013	487	0.0694
Zr	816.142	16279	51.6852	783.154	32.9882	35.1041	29.6029	0.1544	8.7608	9.4321	2.5029	733	0.2353
Nb	5.5501	111	0.2013	3.0501	2.5	2.7	3.1	0.0021	0.3062	0.3297	0.0859	1839	0.1912
Ce	69.666	1393	3.4097	51.665	18.0011	18.8012	17.501	0.027	1.886	2.0305	0.3508	1770	0.2347
Mn	272.194	5439	17.0266	257.994	14.2007	14.7007	13.4006	0.0895	3.4212	3.6833	1.6229	571	0.1665
Hf	104.736	2094	1.3702	20.7623	83.9739	97.5314	70.4164	0.001	0.1442	0.1553	0.0211	726	0.0641
La	43.4062	868	1.7201	26.0636	17.3427	17.401	17.301	0.0132	0.9204	0.9909	0.1727	1681	0.1852
Nd	27.6692	830	1.1247	17.0422	10.627	11.4671	9.667	0.0151	1.0862	1.1695	0.1963	1939	0.2185
O									36.5254	39.324	59.4926
Total									92.8831	100	100
Formula	Oxide
Na2O	11.475
Al2O3	0.1966
SiO2	48.258
Cl	0.2929
K2O	0.786
CaO	6.5148
TiO2	0.1487
FeO	2.0571
Y2O3	1.7387
ZrO2	11.8341
Nb2O5	0.4381
Ce2O3	2.2091
MnO	4.4175
HfO2	0.1701
La2O3	1.0794
Nd2O3	1.267
Total	92.8831
	36 / 1 . X = -13840. Y = -8766. Z = 23.
Na	1994.64	19816	127.622	1933.79	60.8584	63.8134	59.0115	0.91	8.8121	9.4407	9.9634	574	0.3465
Al	152.076	3040	5.8571	88.7487	63.3276	67.6151	57.611	0.0024	0.1466	0.157	0.1412	150	0.0163
Si	7798.67	76030	510.807	7739.96	58.7124	76.0191	41.4057	0.9015	22.596	24.2079	20.9128	361	0.2966
Cl	46.7572	935	2.6898	40.7571	6.0001	6.2001	5.8001	0.0709	0.2997	0.3211	0.2197	207	0.0387
K	204.838	2047	12.1444	184.017	20.8214	21.0015	20.6014	0.0478	0.6218	0.6662	0.4134	250	0.0482
Ca	357.02	3566	22.7766	345.12	11.9005	12.0005	11.8005	0.1116	3.8389	4.1127	2.4897	623	0.2092
Ti	99.6327	1992	2.8644	43.4022	56.2305	61.4125	50.3084	0.0028	0.0998	0.1069	0.0541	197	0.0193
Fe	154.228	3083	9.0099	136.522	17.7069	19.4012	16.2009	0.014	1.6428	1.76	0.7646	579	0.1072
Y	401.582	8021	20.4697	310.165	91.4165	86.5247	95.33	0.0213	1.3883	1.4873	0.4059	488	0.0698
Zr	868.231	17315	55.1116	835.073	33.1576	37.5046	26.2023	0.1647	9.3389	10.0051	2.6611	735	0.2435
Nb	5.7001	114	0.2112	3.2001	2.5	3.1	2.5	0.0022	0.3212	0.3442	0.0899	1839	0.193
Ce	75.4188	1508	3.7497	56.8176	18.6011	18.6011	18.6011	0.0297	2.0696	2.2172	0.3839	1795	0.2432
Mn	269.64	5388	16.8524	255.354	14.2853	15.9008	11.7005	0.0886	3.3793	3.6203	1.5989	572	0.1653
Hf	117.445	2348	2.1166	32.071	85.3746	97.8316	72.9175	0.0015	0.2229	0.2388	0.0325	732	0.0665
La	42.456	849	1.6689	25.2883	17.1676	18.1011	16.5009	0.0128	0.891	0.9546	0.1667	1668	0.183
Nd	26.769	803	1.0782	16.3376	10.4315	10.8671	9.9337	0.0145	1.0391	1.1132	0.1872	1917	0.2148
O									36.6337	39.247	59.5149
Total									93.3414	100	100
Formula	Oxide
Na2O	11.8785
Al2O3	0.2769
SiO2	48.3413
Cl	0.2997
K2O	0.749
CaO	5.3714
TiO2	0.1664
FeO	2.1134
Y2O3	1.7631
ZrO2	12.615
Nb2O5	0.4596
Ce2O3	2.424
MnO	4.3634
HfO2	0.2628
La2O3	1.045
Nd2O3	1.2119
Total	93.3414
	37 / 1 . X = -13714. Y = -9418. Z = 23.
Na	1810.35	17996	116.572	1750.51	59.8426	61.8126	58.6113	0.8312	8.1269	8.801	9.3586	580	0.3251
Al	106.387	2127	2.7438	41.2019	65.1855	67.1149	62.6129	0.0011	0.0688	0.0745	0.0675	154	0.0147
Si	7643.56	74555	504.757	7579.74	63.8147	83.6231	44.0064	0.8908	22.3549	24.209	21.0723	380	0.2958
Cl	54.6599	1093	3.0639	46.0096	8.6502	8.0002	9.3003	0.0807	0.3402	0.3684	0.254	249	0.0428
K	244.697	2445	15.0125	225.436	19.2612	19.8013	18.6011	0.0591	0.7664	0.83	0.5189	242	0.0524
Ca	349.002	3486	22.5152	338.101	10.9004	11.8005	10.0003	0.1104	3.7845	4.0984	2.4998	600	0.2078
Ti	92.7284	1854	2.2546	33.8567	58.8717	66.7147	49.9082	0.0022	0.0782	0.0847	0.0432	202	0.0191
Fe	119.597	2391	6.8326	102.602	16.9951	16.2009	17.701	0.0106	1.2436	1.3467	0.5895	571	0.0959
Y	467.32	9332	24.9629	374.858	92.4617	85.1239	98.3319	0.026	1.6928	1.8332	0.5041	495	0.076
Zr	768.192	15325	49.0742	736.928	31.2648	34.804	25.6022	0.1466	8.3109	9.0002	2.412	720	0.2292
Nb	8.7503	175	0.4162	6.2503	2.5	4.2001	2.4	0.0044	0.6342	0.6867	0.1807	1859	0.2288
Ce	87.3752	1747	4.627	69.4818	17.8934	19.0012	17.201	0.0366	2.5477	2.759	0.4814	1772	0.2613
Mn	306.46	6123	19.6279	294.744	11.7158	10.6004	13.5006	0.1032	3.9299	4.2558	1.8938	522	0.1793
Hf	109.54	2190	1.7391	26.1159	83.4237	98.3319	68.5155	0.0013	0.1833	0.1985	0.0272	731	0.0655
La	50.6585	1013	2.2241	33.3991	17.2593	15.1008	18.8012	0.0171	1.1845	1.2827	0.2258	1684	0.1969
Nd	26.8024	804	1.0653	15.9975	10.8048	10.4004	11.2671	0.0143	1.0244	1.1093	0.188	1964	0.2173
O									36.0703	39.0618	59.6832
Total									92.3414	100	100
Formula	Oxide
Na2O	10.9549
Al2O3	0.1301
SiO2	47.8255
Cl	0.3402
K2O	0.9232
CaO	5.2953
TiO2	0.1305
FeO	1.5998
Y2O3	2.1498
ZrO2	11.2264
Nb2O5	0.9072
Ce2O3	2.984
MnO	5.0744
HfO2	0.2162
La2O3	1.3891
Nd2O3	1.1948
Total	92.3414
	38 / 1 . X = -12996. Y = -8894. Z = 27.
Na	2009.84	19966	128.855	1952.26	57.5803	65.214	52.8092	0.9188	8.8929	9.559	10.0605	558	0.3489
Al	141.966	2838	5.0847	77.0382	64.9283	69.8161	58.4113	0.0021	0.1273	0.1368	0.1227	152	0.016
Si	7766.27	75722	508.303	7701.25	65.0148	81.4219	48.6078	0.897	22.4694	24.1523	20.8074	380	0.2957
Cl	48.8079	976	2.8782	43.6078	5.2001	4.8001	5.6001	0.0758	0.3202	0.3442	0.2349	192	0.0394
K	169.695	1696	10.0307	151.974	17.721	18.8012	16.4009	0.0395	0.5131	0.5515	0.3413	230	0.0439
Ca	410.957	4104	26.385	399.756	11.2004	11.6004	10.8004	0.1293	4.4474	4.7805	2.8859	605	0.225
Ti	101.384	2027	3.1026	47.0073	54.3766	61.6125	46.107	0.003	0.1083	0.1164	0.0588	194	0.0193
Fe	139.714	2793	8.0967	122.672	17.0421	18.1011	16.1009	0.0126	1.4787	1.5894	0.6886	569	0.1024
Y	449.416	8975	23.9422	362.746	86.6693	80.7215	91.4276	0.0249	1.623	1.7446	0.4748	475	0.0736
Zr	831.777	16590	52.5485	796.157	35.6197	39.5052	29.4029	0.157	8.9002	9.5668	2.5376	762	0.2378
Nb	5.1001	102	0.1716	2.6001	2.5	4.3001	3.6	0.0018	0.2614	0.2809	0.0732	1841	0.186
Ce	71.717	1434	3.5317	53.5082	18.2088	18.7012	17.9011	0.0279	1.9529	2.0992	0.3625	1780	0.2379
Mn	272.194	5439	16.9943	257.478	14.7161	15.6008	13.3006	0.0893	3.4136	3.6693	1.616	581	0.1665
Hf	104.786	2095	1.2449	18.8616	85.9247	95.6302	76.2192	0.0009	0.1311	0.1409	0.0191	735	0.0644
La	41.6057	832	1.6306	24.7048	16.901	19.7013	14.9007	0.0125	0.8723	0.9376	0.1633	1659	0.1817
Nd	26.769	803	1.0299	15.6042	11.1649	11.6004	10.667	0.0139	0.9943	1.0688	0.1793	1987	0.217
O									36.5263	39.262	59.3741
Total									93.0324	100	100
Formula	Oxide
Na2O	11.9875
Al2O3	0.2405
SiO2	48.0705
Cl	0.3202
K2O	0.6181
CaO	6.2228
TiO2	0.1806
FeO	1.9023
Y2O3	2.0612
ZrO2	12.0224
Nb2O5	0.3739
Ce2O3	2.2874
MnO	4.4078
HfO2	0.1546
La2O3	1.023
Nd2O3	1.1597
Total	93.0324
	39 / 1 . X = -12349. Y = -8915. Z = 26.
Na	1909.56	18976	122.2	1851.62	57.9342	57.811	58.0111	0.8714	8.4554	9.1994	9.7076	561	0.3348
Al	129.806	2595	4.3628	66.1064	63.6992	68.4154	57.4109	0.0018	0.109	0.1186	0.1066	150	0.0154
Si	7685.6	74955	503.213	7624.89	60.7132	78.6204	42.8061	0.8881	22.2394	24.1963	20.9005	367	0.2935
Cl	50.1583	1003	2.8285	42.8581	7.3002	7.6002	7.0002	0.0745	0.3146	0.3423	0.2342	227	0.0404
K	221.462	2213	13.3893	202.881	18.5812	20.2014	16.6009	0.0527	0.6848	0.7451	0.4623	236	0.0496
Ca	394.212	3937	25.2641	382.812	11.4004	11.6004	11.2004	0.1238	4.2587	4.6335	2.8046	610	0.2202
Ti	95.8303	1916	2.6293	39.8399	55.9904	59.9118	51.5088	0.0026	0.0917	0.0998	0.0505	197	0.019
Fe	147.472	2948	8.5733	129.906	17.5657	17.301	17.8011	0.0133	1.5645	1.7022	0.7394	577	0.105
Y	441.041	8808	23.112	350.203	90.8384	86.7248	94.1292	0.024	1.5658	1.7036	0.4649	486	0.0731
Zr	817.701	16310	51.8357	785.436	32.2651	36.3044	25.8022	0.1549	8.7769	9.5493	2.5396	725	0.2352
Nb	6.1501	123	0.2409	3.6501	2.5	3.6	3.4	0.0025	0.3666	0.3989	0.1042	1840	0.1984
Ce	75.0686	1501	3.6728	55.652	19.4166	18.8012	19.8013	0.029	2.0296	2.2082	0.3823	1836	0.2438
Mn	271.343	5422	17.0603	258.504	12.839	13.3006	12.1005	0.0897	3.4248	3.7261	1.6454	543	0.1659
Hf	114.343	2286	1.9283	29.2187	85.1245	98.0317	72.2172	0.0014	0.2027	0.2205	0.03	730	0.0658
La	43.4562	869	1.7019	25.7885	17.6677	17.9011	17.501	0.013	0.9099	0.99	0.1729	1695	0.1856
Nd	24.7687	743	0.8814	13.3549	11.4138	11.1337	11.7338	0.0119	0.8502	0.925	0.1556	2007	0.2113
O									36.0674	39.2412	59.4994
Total									91.9121	100	100
Formula	Oxide
Na2O	11.3977
Al2O3	0.206
SiO2	47.5783
Cl	0.3146
K2O	0.8249
CaO	5.9588
TiO2	0.153
FeO	2.0127
Y2O3	1.9885
ZrO2	11.8559
Nb2O5	0.5244
Ce2O3	2.3772
MnO	4.4222
HfO2	0.239
La2O3	1.0671
Nd2O3	0.9917
Total	91.9121
	40 / 1 . X = -11510. Y = -9263. Z = 29.
Na	2055.14	20413	131.411	1990.79	64.3521	65.214	63.8134	0.937	9.0539	9.7642	10.3072	589	0.3545
Al	133.659	2672	4.4907	68.0304	65.6286	69.616	60.312	0.0019	0.1126	0.1214	0.1092	153	0.0157
Si	7651.96	74635	501.155	7592.15	59.8129	77.6199	42.0058	0.8844	22.2143	23.9569	20.7008	365	0.2936
Cl	52.6091	1052	2.9413	44.5589	8.0502	7.8002	8.3002	0.0775	0.327	0.3527	0.2414	239	0.0415
K	175.001	1749	10.1384	153.589	21.4115	22.4017	20.2014	0.0399	0.5182	0.5589	0.3469	253	0.0449
Ca	408.851	4083	26.1828	396.65	12.2005	14.4007	10.0003	0.1283	4.4089	4.7548	2.879	630	0.2244
Ti	98.7822	1975	2.7371	41.4646	57.3176	62.3128	51.6088	0.0027	0.0954	0.1029	0.0521	199	0.0193
Fe	116.495	2329	6.5932	99.8821	16.6127	16.4009	16.8009	0.0103	1.2026	1.2969	0.5636	561	0.094
Y	490.743	9799	26.2516	397.693	93.0508	90.3269	95.2299	0.0273	1.7798	1.9195	0.5239	492	0.0773
Zr	789.502	15749	50.0383	758.044	31.4572	35.3041	25.3021	0.1495	8.4738	9.1385	2.4312	716	0.2307
Nb	7.0502	141	0.3004	4.5502	2.5	3	3.2	0.0032	0.458	0.494	0.129	1844	0.209
Ce	77.2697	1545	3.8844	58.8455	18.4242	16.7009	19.5013	0.0307	2.146	2.3144	0.4008	1789	0.246
Mn	271.693	5429	17.0194	257.831	13.8622	14.4007	13.0006	0.0895	3.415	3.6829	1.6269	564	0.1661
Hf	118.646	2372	2.5199	38.1746	80.4719	92.5282	68.4154	0.0018	0.2657	0.2865	0.039	712	0.0661
La	46.4571	929	1.8767	28.4311	18.0261	19.6013	16.9009	0.0144	1.003	1.0817	0.189	1712	0.1907
Nd	26.3356	790	1.0519	15.9353	10.4004	10.4004	10.4004	0.0142	1.0142	1.0937	0.184	1916	0.2135
O									36.2375	39.0802	59.2759
Total									92.7261	100	100
Formula	Oxide
Na2O	12.2045
Al2O3	0.2128
SiO2	47.5246
Cl	0.327
K2O	0.6243
CaO	6.169
TiO2	0.1591
FeO	1.5471
Y2O3	2.2603
ZrO2	11.4463
Nb2O5	0.6552
Ce2O3	2.5136
MnO	4.4096
HfO2	0.3133
La2O3	1.1763
Nd2O3	1.1829
Total	92.7261
	41 / 1 . X = -11530. Y = -8534. Z = 30.
Na	1928.8	19166	123.454	1870.25	58.5498	59.4116	58.0111	0.8803	8.5086	9.1941	9.6922	562	0.3364
Al	118.496	2369	3.4388	52.096	66.4003	70.5164	60.9122	0.0014	0.0857	0.0926	0.0832	153	0.015
Si	7760.59	75668	508.239	7699.47	61.1136	80.4213	41.8058	0.8969	22.4145	24.2204	20.9001	367	0.2949
Cl	52.0589	1041	3.0007	45.4588	6.6001	6.2001	7.0002	0.0791	0.3338	0.3607	0.2466	216	0.0411
K	238.788	2386	14.4717	219.237	19.5513	20.0013	19.0012	0.057	0.7403	0.8	0.4959	242	0.0515
Ca	425.196	4246	27.3079	413.695	11.5004	12.6005	10.4004	0.1338	4.6072	4.9784	3.0103	613	0.2294
Ti	97.3313	1946	2.7804	42.1211	55.2102	61.5125	48.0076	0.0027	0.0972	0.105	0.0531	196	0.0191
Fe	124.101	2481	7.018	106.317	17.7834	19.9013	15.9008	0.0109	1.2815	1.3847	0.6009	581	0.0972
Y	513.77	10258	27.7385	420.218	93.5513	85.8243	99.7328	0.0288	1.8777	2.029	0.5531	493	0.0791
Zr	794.88	15856	50.2764	761.653	33.2268	37.3046	26.7024	0.1502	8.5033	9.1883	2.4412	735	0.2314
Nb	7.4002	148	0.3235	4.9002	2.5	4.1001	3.8	0.0034	0.4931	0.5328	0.139	1843	0.2127
Ce	70.4164	1408	3.5249	53.4	17.0163	17.201	16.9009	0.0279	1.9508	2.108	0.3646	1722	0.2349
Mn	262.828	5252	16.4951	249.889	12.939	13.9006	11.4004	0.0867	3.3137	3.5806	1.5796	546	0.163
Hf	111.341	2226	1.856	28.1174	83.2235	97.1311	69.3159	0.0013	0.1947	0.2104	0.0286	721	0.0649
La	40.5054	810	1.5328	23.2211	17.2843	17.401	17.201	0.0118	0.8207	0.8868	0.1547	1679	0.1807
Nd	26.369	791	1.0168	15.4041	10.9648	11.4004	10.467	0.0137	0.9818	1.0609	0.1782	1970	0.2153
O									36.3397	39.2674	59.4789
Total									92.5442	100	100
Formula	Oxide
Na2O	11.4694
Al2O3	0.162
SiO2	47.9531
Cl	0.3338
K2O	0.8918
CaO	6.4464
TiO2	0.1621
FeO	1.6486
Y2O3	2.3846
ZrO2	11.4862
Nb2O5	0.7053
Ce2O3	2.285
MnO	4.2787
HfO2	0.2296
La2O3	0.9625
Nd2O3	1.1451
Total	92.5442
	42 / 1 . X = -10830. Y = -8583. Z = 32.
Na	1942.27	19299	124.475	1885.9	56.3644	59.8118	54.2097	0.8876	8.5585	9.3022	9.8119	550	0.3377
Al	134.51	2689	4.1907	63.4929	71.0168	76.7194	63.4133	0.0017	0.1044	0.1135	0.102	158	0.0158
Si	7693.6	75031	503.995	7635.98	57.6114	69.8161	45.4068	0.8894	22.2414	24.1742	20.8722	357	0.2933
Cl	53.1093	1062	3.0928	46.8592	6.2501	5.4001	7.1002	0.0815	0.3443	0.3742	0.256	211	0.0415
K	223.765	2236	13.5368	205.094	18.6712	20.2014	16.8009	0.0533	0.6928	0.753	0.467	236	0.0499
Ca	411.759	4112	26.5105	401.658	10.1003	10.6004	9.6003	0.1299	4.4726	4.8613	2.9412	575	0.2252
Ti	100.984	2019	2.7188	41.1915	59.7921	69.3159	48.9079	0.0027	0.095	0.1032	0.0523	203	0.0196
Fe	122.149	2442	6.9859	105.843	16.3068	17.101	15.6008	0.0109	1.275	1.3859	0.6017	556	0.096
Y	543.473	10850	29.8641	452.468	91.0051	87.7254	93.6289	0.0311	2.0214	2.1971	0.5993	486	0.0813
Zr	795.382	15866	50.3089	762.225	33.1576	37.0045	27.0024	0.1503	8.5089	9.2483	2.4585	734	0.2314
Nb	6.6001	132	0.2706	4.1001	2.5	4.3001	2.7	0.0028	0.4129	0.4488	0.1171	1845	0.204
Ce	72.9175	1458	3.5383	53.6086	19.3089	19.8013	19.0012	0.028	1.9577	2.1278	0.3682	1833	0.2409
Mn	254.764	5091	15.9108	241.063	13.7006	14.7007	12.1005	0.0836	3.1952	3.4728	1.5329	561	0.1601
Hf	119.397	2387	2.4536	37.1743	82.2228	94.2293	70.2163	0.0018	0.2573	0.2797	0.038	716	0.0661
La	42.656	853	1.6636	25.205	17.451	17.8011	17.201	0.0128	0.8906	0.968	0.169	1687	0.1843
Nd	25.1688	755	0.9187	13.9194	11.2493	12.8672	9.4003	0.0124	0.8867	0.9637	0.162	1994	0.2122
O									36.09	39.2263	59.4508
Total									92.0046	100	100
Formula	Oxide
Na2O	11.5367
Al2O3	0.1973
SiO2	47.5826
Cl	0.3443
K2O	0.8345
CaO	6.2581
TiO2	0.1584
FeO	1.6403
Y2O3	2.5671
ZrO2	11.4938
Nb2O5	0.5907
Ce2O3	2.293
MnO	4.1257
HfO2	0.3035
La2O3	1.0444
Nd2O3	1.0342
Total	92.0046
	43 / 1 . X = -10839. Y = -8914. Z = 32.
Na	1983.5	19706	127.17	1926.73	56.7645	58.6113	55.6102	0.9068	8.7783	9.45	9.9509	554	0.3452
Al	138.714	2773	4.9785	75.4288	63.2847	66.4146	59.1115	0.0021	0.1245	0.134	0.1203	150	0.0158
Si	7762.58	75687	508.219	7699.97	62.6139	79.821	45.4068	0.8969	22.4616	24.1804	20.8425	373	0.2955
Cl	49.6581	993	2.766	41.9079	7.7502	9.5003	6.0001	0.0729	0.3076	0.3312	0.2261	234	0.0402
K	217.756	2176	13.0867	198.275	19.4813	16.6009	23.0018	0.0515	0.6694	0.7206	0.4462	241	0.0493
Ca	405.642	4051	25.9814	393.642	12.0005	13.0006	11.0004	0.1273	4.3806	4.7158	2.8484	626	0.2237
Ti	102.685	2053	3.0665	46.4609	56.2239	61.3124	50.4084	0.003	0.107	0.1152	0.0582	197	0.0195
Fe	138.714	2773	8.1378	123.295	15.4184	16.0008	14.9007	0.0127	1.486	1.5997	0.6935	541	0.1015
Y	474.893	9483	25.1615	381.219	93.6736	84.7237	100.834	0.0262	1.7057	1.8362	0.5	494	0.076
Zr	812.875	16214	51.5	780.271	32.6036	36.1043	27.0024	0.1539	8.7218	9.3892	2.4918	729	0.2345
Nb	5.5001	110	0.198	3.0001	2.5	3.8	2.8	0.0021	0.3018	0.3249	0.0846	1843	0.191
Ce	71.0166	1420	3.6028	54.585	16.4317	20.0013	14.2007	0.0285	1.9922	2.1446	0.3705	1691	0.235
Mn	269.189	5379	16.9802	257.265	11.9236	12.5005	11.0004	0.0893	3.4106	3.6716	1.6179	524	0.1651
Hf	109.039	2180	1.5884	24.0651	84.9741	94.8297	75.1186	0.0012	0.1671	0.1799	0.0244	730	0.065
La	41.7057	834	1.6394	24.8381	16.8676	15.7008	17.701	0.0126	0.877	0.9441	0.1645	1657	0.1818
Nd	25.7689	773	0.9715	14.7196	11.0493	12.2005	9.7336	0.0131	0.9378	1.0096	0.1694	1976	0.2136
O									36.4625	39.2528	59.3908
Total									92.8917	100	100
Formula	Oxide
Na2O	11.8329
Al2O3	0.2353
SiO2	48.0538
Cl	0.3076
K2O	0.8063
CaO	6.1294
TiO2	0.1785
FeO	1.9118
Y2O3	2.1661
ZrO2	11.7814
Nb2O5	0.4317
Ce2O3	2.3334
MnO	4.4039
HfO2	0.1971
La2O3	1.0285
Nd2O3	1.0939
Total	92.8917
	44 / 1 . X = -13560. Y = -6472. Z = 25.
Na	1756.42	17463	112.605	1705.89	50.5315	52.0089	49.6081	0.8029	7.6532	8.4261	8.7845	515	0.3071
Al	166.491	3328	6.3324	95.9321	70.5593	73.2177	67.0148	0.0026	0.1547	0.1704	0.1513	155	0.0167
Si	7943.09	77402	519.778	7874.27	68.8166	86.0244	51.6088	0.9173	22.6531	24.9408	21.284	385	0.2959
Cl	50.8585	1017	2.971	45.0084	5.8501	5.7001	6.0001	0.0783	0.3326	0.3662	0.2475	205	0.0407
K	262.427	2622	16.0777	243.566	18.8612	19.4012	18.2011	0.0633	0.8273	0.9108	0.5584	239	0.054
Ca	485.878	4851	31.2277	473.077	12.8006	15.6008	10.0003	0.1531	5.3094	5.8456	3.4957	652	0.2484
Ti	75.6689	1513	1.3703	20.7589	54.91	59.8118	49.308	0.0013	0.0484	0.0533	0.0267	197	0.0179
Fe	203.687	4071	12.3763	187.492	16.195	17.201	15.3008	0.0193	2.2705	2.4998	1.0728	557	0.1227
Y	605.156	12079	33.801	512.061	93.0954	84.9238	99.6327	0.0351	2.2823	2.5127	0.6774	491	0.0861
Zr	825.543	16466	52.4585	794.709	30.834	34.1038	25.6022	0.1567	8.8614	9.7563	2.5634	707	0.2358
Nb	6.3501	127	0.2541	3.8501	2.5	2.7	3.8	0.0027	0.3883	0.4275	0.1103	1847	0.2015
Ce	44.0564	881	1.7783	26.9401	17.1164	18.1011	16.5009	0.0141	0.9916	1.0917	0.1867	1740	0.1949
Mn	130.957	2618	7.8121	118.348	12.6082	12.3005	13.1006	0.0411	1.5764	1.7356	0.7572	541	0.112
Hf	122.099	2441	2.6058	39.4762	82.623	94.8297	70.4164	0.0019	0.2692	0.2963	0.0398	707	0.0656
La	27.4525	549	0.7394	11.2016	16.2509	17.301	15.5008	0.0057	0.3993	0.4396	0.0759	1642	0.1582
Nd	18.5011	555	0.5201	7.8785	10.6226	11.4004	9.7336	0.007	0.5051	0.5561	0.0924	1950	0.1901
O									36.3048	39.9712	59.8761
Total									90.8275	100	100
Formula	Oxide
Na2O	10.3164
Al2O3	0.2924
SiO2	48.4634
Cl	0.3326
K2O	0.9966
CaO	7.429
TiO2	0.0808
FeO	2.921
Y2O3	2.8984
ZrO2	11.97
Nb2O5	0.5554
Ce2O3	1.1614
MnO	2.0355
HfO2	0.3174
La2O3	0.4683
Nd2O3	0.5891
Total	90.8275
	45 / 1 . X = -14329. Y = -6462. Z = 21.
Na	1799.32	17887	114.811	1739.49	59.8272	59.2116	60.212	0.8187	7.8324	8.5996	8.9914	562	0.3137
Al	160.735	3213	5.9056	89.4756	71.2597	74.5183	66.9148	0.0024	0.145	0.1592	0.1418	156	0.0166
Si	7850.65	76524	514.111	7789.24	61.4136	80.4213	42.4059	0.9073	22.4665	24.6671	21.1114	365	0.2944
Cl	54.2097	1084	3.1061	47.0595	7.1502	7.4002	6.9002	0.0819	0.3471	0.3811	0.2584	226	0.0423
K	217.857	2177	13.354	202.326	15.5308	15.8008	15.2008	0.0526	0.6861	0.7533	0.4631	217	0.0491
Ca	492.599	4918	31.7406	480.899	11.7005	10.4004	13.0006	0.1556	5.3862	5.9138	3.5467	622	0.2495
Ti	83.9733	1679	1.9262	29.1833	54.79	58.7114	50.3084	0.0019	0.0679	0.0746	0.0374	197	0.0184
Fe	199.681	3991	11.9996	181.804	17.8775	18.3011	17.501	0.0187	2.1994	2.4148	1.0394	585	0.1218
Y	590.298	11783	32.8556	497.792	92.506	91.7278	93.1286	0.0342	2.2178	2.4351	0.6584	489	0.0849
Zr	799.705	15952	50.6373	767.201	32.5036	36.0043	26.9024	0.1513	8.5488	9.3862	2.4733	725	0.2317
Nb	9.1503	183	0.4389	6.6503	2.5	3	2.9	0.0046	0.67	0.7356	0.1903	1845	0.2312
Ce	48.7578	975	2.0356	30.8414	17.9164	18.9012	17.301	0.0161	1.1335	1.2446	0.2135	1778	0.2036
Mn	144.219	2883	8.6917	131.687	12.5313	13.3006	11.3004	0.0457	1.7523	1.9239	0.8418	539	0.1176
Hf	122.249	2444	2.3183	35.1238	87.1255	98.8322	75.4188	0.0017	0.2403	0.2639	0.0355	729	0.0666
La	30.9532	619	0.9792	14.8356	16.1175	16.0008	16.2009	0.0075	0.528	0.5797	0.1003	1633	0.164
Nd	19.6346	589	0.6312	9.5632	10.0715	10.1337	10.0003	0.0085	0.6123	0.6723	0.112	1897	0.192
O									36.245	39.7953	59.7853
Total									91.0786	100	100
Formula	Oxide
Na2O	10.558
Al2O3	0.274
SiO2	48.0642
Cl	0.3471
K2O	0.8265
CaO	7.5364
TiO2	0.1133
FeO	2.8295
Y2O3	2.8165
ZrO2	11.5477
Nb2O5	0.9584
Ce2O3	1.3277
MnO	2.2626
HfO2	0.2834
La2O3	0.6192
Nd2O3	0.7142
Total	91.0786
	46 / 1 . X = -14933. Y = -6470. Z = 21.
Na	1611.83	16033	102.644	1554.99	56.8415	52.4091	59.6117	0.7319	7.0514	7.7597	8.1618	552	0.2884
Al	104.536	2090	2.1381	32.3901	72.146	79.821	61.9127	0.0009	0.0524	0.0576	0.0517	157	0.0144
Si	7861.07	76623	515.137	7803.96	57.1117	73.6179	40.6054	0.9091	22.4571	24.7127	21.2774	351	0.2939
Cl	44.7566	895	2.5451	38.5565	6.2001	6.2001	6.2001	0.0671	0.2839	0.3124	0.2131	210	0.0379
K	302.301	3020	18.7989	284.79	17.511	17.601	17.401	0.074	0.9638	1.0606	0.656	229	0.0574
Ca	517.884	5170	33.4922	507.383	10.5004	12.8005	8.2002	0.1642	5.6779	6.2483	3.7697	589	0.2558
Ti	85.3741	1707	1.9075	28.8967	56.4774	63.7134	48.2077	0.0019	0.0672	0.0739	0.0373	199	0.0186
Fe	191.07	3819	11.6165	175.981	15.089	16.2009	14.1007	0.0181	2.1272	2.3408	1.0136	537	0.1185
Y	564.5	11269	30.9998	469.625	94.8742	92.4282	96.8309	0.0322	2.0881	2.2978	0.625	494	0.0827
Zr	809.557	16148	51.3093	777.3	32.2573	35.6042	26.9024	0.1533	8.6461	9.5145	2.5222	721	0.2328
Nb	9.1503	183	0.439	6.6503	2.5	4.7001	2.5	0.0046	0.6681	0.7352	0.1914	1840	0.2306
Ce	53.0093	1060	2.1824	33.0618	19.9475	21.3015	19.1012	0.0173	1.2144	1.3364	0.2306	1874	0.2129
Mn	151.876	3036	9.1813	139.091	12.7852	13.4006	11.8005	0.0483	1.8496	2.0354	0.8959	544	0.1208
Hf	121.098	2421	2.3053	34.9235	86.1749	96.4307	75.919	0.0017	0.2383	0.2623	0.0355	723	0.0661
La	36.1043	722	1.3578	20.5702	15.5341	16.7009	14.7007	0.0104	0.7317	0.8052	0.1402	1603	0.1718
Nd	20.6681	620	0.6631	10.0455	10.6226	11.4004	9.7336	0.0089	0.6427	0.7072	0.1186	1946	0.197
O									36.1127	39.7399	60.0603
Total									90.8726	100	100
Formula	Oxide
Na2O	9.5051
Al2O3	0.099
SiO2	48.0441
Cl	0.2839
K2O	1.161
CaO	7.9446
TiO2	0.1121
FeO	2.7366
Y2O3	2.6518
ZrO2	11.6791
Nb2O5	0.9558
Ce2O3	1.4225
MnO	2.3883
HfO2	0.2811
La2O3	0.8581
Nd2O3	0.7496
Total	90.8726
	47 / 1 . X = -15032. Y = -5875. Z = 21.
Na	1661.56	16525	106.358	1611.24	50.3161	50.8085	50.0083	0.7584	7.2434	7.9832	8.3454	515	0.2938
Al	159.133	3181	5.7864	87.6593	71.4742	78.1201	62.6129	0.0024	0.1411	0.1555	0.1385	155	0.0164
Si	7974.37	77699	522.298	7912.45	61.9136	78.8205	45.0067	0.9217	22.7176	25.0378	21.425	365	0.2961
Cl	52.9092	1058	3.0965	46.9091	6.0001	6.7001	5.3001	0.0816	0.3467	0.3822	0.2591	208	0.0417
K	265.633	2654	16.3368	247.492	18.1411	17.601	18.8012	0.0643	0.8407	0.9265	0.5695	234	0.0543
Ca	476.147	4754	30.8296	467.047	9.1003	9.6003	8.6002	0.1511	5.2403	5.7755	3.4631	551	0.2449
Ti	79.2707	1585	1.476	22.36	56.9108	61.8126	51.3087	0.0014	0.0521	0.0574	0.0288	201	0.0182
Fe	200.082	3999	12.0742	182.916	17.1657	19.6013	15.0007	0.0188	2.2134	2.4395	1.0498	573	0.1218
Y	616.853	12312	34.62	524.469	92.3837	88.826	95.2299	0.036	2.3351	2.5736	0.6957	488	0.0869
Zr	832.682	16608	52.8459	800.578	32.1035	35.1041	27.3025	0.1579	8.9184	9.8293	2.5896	721	0.2368
Nb	7.3002	146	0.3169	4.8002	2.5	2.4	2.6	0.0033	0.4838	0.5332	0.1379	1846	0.212
Ce	47.4074	948	1.9452	29.4679	17.9395	20.4014	16.4009	0.0154	1.0839	1.1946	0.2049	1780	0.2015
Mn	135.16	2702	8.1785	123.898	11.262	11.3004	11.2004	0.043	1.6493	1.8177	0.7952	511	0.1134
Hf	125.202	2503	2.4672	37.3758	87.8259	99.0324	76.6194	0.0018	0.2543	0.2803	0.0377	727	0.0668
La	28.9028	578	0.7867	11.9185	16.9843	17.8011	16.4009	0.006	0.4245	0.4679	0.081	1678	0.162
Nd	18.7345	562	0.5067	7.6763	11.0582	11.8671	10.1337	0.0068	0.4917	0.5419	0.0903	1988	0.1921
O									36.2967	40.0038	60.0884
Total									90.733	100	100
Formula	Oxide
Na2O	9.7639
Al2O3	0.2666
SiO2	48.6013
Cl	0.3467
K2O	1.0127
CaO	7.3322
TiO2	0.0869
FeO	2.8476
Y2O3	2.9655
ZrO2	12.047
Nb2O5	0.6921
Ce2O3	1.2696
MnO	2.1296
HfO2	0.2999
La2O3	0.4979
Nd2O3	0.5735
Total	90.7331
	48 / 1 . X = -14136. Y = -5798. Z = 22.
Na	1558.78	15508	99.3411	1504.8	53.9788	53.6095	54.2097	0.7084	6.7932	7.5443	7.876	536	0.2795
Al	167.192	3342	6.3378	96.0039	71.1884	77.92	62.2128	0.0026	0.1543	0.1713	0.1524	155	0.0167
Si	7957.73	77541	521.014	7892.21	65.5152	83.0227	48.0076	0.9195	22.6562	25.1611	21.5016	375	0.2956
Cl	50.5584	1011	2.9053	44.0083	6.5501	7.0002	6.1001	0.0766	0.3247	0.3606	0.2441	217	0.0406
K	270.541	2703	16.6348	251.98	18.5612	20.0013	16.8009	0.0655	0.8549	0.9494	0.5828	237	0.0547
Ca	531.029	5301	34.2907	519.428	11.6004	12.0005	11.2004	0.1681	5.8294	6.4739	3.8767	621	0.2602
Ti	78.8705	1577	1.5734	23.8338	55.0367	58.9115	50.6085	0.0015	0.0557	0.0618	0.031	198	0.0181
Fe	208.143	4160	12.6022	190.895	17.248	17.301	17.201	0.0196	2.3134	2.5692	1.1041	575	0.1244
Y	592.557	11828	33.1832	502.652	89.9045	89.6265	90.1268	0.0345	2.2397	2.4873	0.6715	482	0.085
Zr	809.054	16138	51.1918	775.443	33.6115	37.3046	27.7025	0.153	8.6456	9.6015	2.5262	738	0.2334
Nb	6.0501	121	0.2344	3.5501	2.5	2.8	3.2	0.0025	0.3578	0.3974	0.1027	1846	0.1979
Ce	44.4565	889	1.8151	27.494	16.9625	18.5011	16.0008	0.0144	1.0131	1.1251	0.1927	1734	0.1956
Mn	127.504	2549	7.683	116.38	11.1235	10.7004	11.8005	0.0404	1.5514	1.7229	0.7527	509	0.1101
Hf	120.798	2415	2.54	38.4751	82.323	96.2306	68.4154	0.0018	0.2615	0.2905	0.0391	704	0.0652
La	26.4023	528	0.6614	10.0181	16.3842	17.9011	15.3008	0.0051	0.3575	0.397	0.0686	1651	0.1567
Nd	18.0344	541	0.5236	7.9318	10.1026	10.6004	9.5336	0.007	0.5089	0.5651	0.094	1903	0.187
O									36.1271	40.1215	60.1839
Total									90.0443	100	100
Formula	Oxide
Na2O	9.1571
Al2O3	0.2915
SiO2	48.47
Cl	0.3247
K2O	1.0298
CaO	8.1564
TiO2	0.0928
FeO	2.9762
Y2O3	2.8443
ZrO2	11.6785
Nb2O5	0.5119
Ce2O3	1.1866
MnO	2.0032
HfO2	0.3084
La2O3	0.4192
Nd2O3	0.5935
Total	90.0443
	49 / 1 . X = -15284. Y = -5044. Z = 17.
Na	1693.31	16839	108.121	1637.96	55.3486	54.6098	55.8103	0.771	7.4254	8.1826	8.5914	545	0.3005
Al	136.712	2733	4.562	69.1108	67.6009	72.6174	60.9122	0.0019	0.1121	0.1235	0.1105	152	0.0156
Si	7786.78	75917	509.519	7718.86	67.9164	87.2251	48.6078	0.8992	22.276	24.5479	21.0979	384	0.293
Cl	42.8561	857	2.3272	35.2559	7.6002	7.4002	7.8002	0.0613	0.2596	0.286	0.1947	233	0.0373
K	255.615	2554	15.4855	234.594	21.0215	21.2015	20.8014	0.061	0.7939	0.8749	0.5401	251	0.0534
Ca	512.866	5120	33.1214	501.766	11.1004	12.2005	10.0003	0.1623	5.6125	6.1849	3.7249	605	0.2545
Ti	85.6742	1713	1.8128	27.4628	58.2114	65.9143	49.4081	0.0018	0.0638	0.0704	0.0355	202	0.0187
Fe	198.53	3968	12.0479	182.517	16.0126	18.5011	13.8006	0.0188	2.2064	2.4314	1.0509	553	0.1209
Y	553.559	11051	30.2865	458.819	94.7408	89.6265	98.8322	0.0315	2.0422	2.2504	0.611	494	0.082
Zr	805.536	16068	50.989	772.447	33.0883	37.2046	26.5023	0.1524	8.6004	9.4775	2.5079	731	0.2325
Nb	8.5002	170	0.3961	6.0002	2.5	2.4	3.1	0.0042	0.6032	0.6647	0.1727	1841	0.2241
Ce	53.0093	1060	2.2708	34.4004	18.6088	19.1012	18.3011	0.018	1.2632	1.392	0.2398	1810	0.2111
Mn	163.438	3267	9.9842	151.253	12.1851	11.8005	12.8005	0.0525	2.0114	2.2165	0.9739	531	0.1254
Hf	124.401	2487	2.5893	39.2266	85.1744	97.1311	73.2177	0.0019	0.2685	0.2958	0.04	720	0.0667
La	33.5037	670	1.1086	16.7944	16.7093	19.1012	15.0007	0.0085	0.5971	0.658	0.1143	1661	0.1693
Nd	20.3347	610	0.6071	9.1965	11.1382	11.2004	11.0671	0.0082	0.5883	0.6483	0.1085	1992	0.1974
O									36.0213	39.695	59.8859
Total									90.7453	100	100
Formula	Oxide
Na2O	10.0092
Al2O3	0.2118
SiO2	47.6568
Cl	0.2596
K2O	0.9564
CaO	7.8531
TiO2	0.1065
FeO	2.8385
Y2O3	2.5934
ZrO2	11.6174
Nb2O5	0.8628
Ce2O3	1.4795
MnO	2.5972
HfO2	0.3166
La2O3	0.7003
Nd2O3	0.6862
Total	90.7453
	50 / 1 . X = -14361. Y = -5037. Z = 20.
Na	1549.99	15421	99.0399	1500.09	49.9006	54.2097	47.2074	0.7062	6.7679	7.5298	7.9125	515	0.2783
Al	106.988	2139	2.3419	35.4708	71.5169	75.4188	66.3145	0.001	0.0571	0.0635	0.0568	155	0.0144
Si	7883.28	76834	516.236	7819.07	64.2151	85.4241	43.0061	0.911	22.4354	24.9611	21.4708	371	0.2936
Cl	48.3077	966	2.7338	41.4075	6.9002	6.5001	7.3002	0.072	0.3056	0.34	0.2317	222	0.0397
K	334.068	3337	20.7454	314.217	19.8513	21.2015	18.2011	0.0817	1.0656	1.1856	0.7326	245	0.0605
Ca	492.8	4920	31.7899	481.5	11.3004	12.2005	10.4004	0.1558	5.3986	6.0064	3.6203	612	0.2497
Ti	88.2757	1765	2.0888	31.6383	56.6374	62.6129	49.8082	0.002	0.0737	0.082	0.0413	200	0.0188
Fe	177.154	3541	10.536	159.582	17.5716	19.0012	16.3009	0.0164	1.9295	2.1467	0.9286	579	0.1149
Y	610.026	12176	34.2994	519.51	90.5159	87.6253	92.8284	0.0357	2.309	2.5689	0.698	482	0.0862
Zr	821.873	16393	51.8964	786.038	35.8352	41.1056	27.4025	0.1551	8.7431	9.7274	2.5762	760	0.2351
Nb	8.4502	169	0.3929	5.9502	2.5	3.2	3.2	0.0041	0.5988	0.6662	0.1732	1843	0.2238
Ce	51.4587	1029	2.2826	34.5732	16.8856	17.501	16.5009	0.0181	1.2712	1.4143	0.2439	1727	0.2067
Mn	144.619	2891	8.6461	130.957	13.6622	13.7006	13.6006	0.0455	1.7424	1.9385	0.8524	562	0.118
Hf	126.653	2532	2.722	41.2282	85.4247	99.4326	71.4168	0.002	0.2801	0.3117	0.0422	716	0.0666
La	32.5535	651	1.1303	17.1194	15.4341	18.7012	13.1006	0.0087	0.6096	0.6783	0.118	1599	0.1657
Nd	19.3679	581	0.4615	6.9896	12.3783	12.5339	12.2005	0.0062	0.4474	0.4977	0.0834	2101	0.198
O									35.8466	39.8821	60.2181
Total									89.8815	100	100
Formula	Oxide
Na2O	9.123
Al2O3	0.1078
SiO2	47.9977
Cl	0.3056
K2O	1.2837
CaO	7.5537
TiO2	0.1229
FeO	2.4823
Y2O3	2.9322
ZrO2	11.8102
Nb2O5	0.8566
Ce2O3	1.489
MnO	2.2498
HfO2	0.3303
La2O3	0.715
Nd2O3	0.5218
Total	89.8815
	51 / 1 . X = -14242. Y = -4509. Z = 19.
Na	1647.51	16386	105.372	1596.32	51.1934	58.2112	46.8072	0.7514	7.2016	8.0043	8.3667	521	0.2926
Al	153.578	3070	5.48	83.0184	70.5594	76.5193	62.6129	0.0023	0.1339	0.1488	0.1325	155	0.0162
Si	7872.86	76735	515.387	7807.75	65.1146	78.2202	52.0089	0.9095	22.446	24.9478	21.3461	375	0.2939
Cl	53.2093	1064	3.0965	46.9092	6.3001	6.1001	6.5001	0.0816	0.3462	0.3848	0.2608	213	0.0418
K	272.044	2718	16.5831	251.223	20.8214	21.0015	20.6014	0.0653	0.8524	0.9475	0.5823	251	0.0551
Ca	488.587	4878	31.5451	477.886	10.7004	9.4003	12.0005	0.1546	5.3593	5.9566	3.5714	596	0.2485
Ti	85.6242	1712	2.0974	31.7746	53.8496	57.9111	49.208	0.0021	0.074	0.0823	0.0413	195	0.0185
Fe	205.289	4103	12.3958	187.788	17.501	19.3012	15.9008	0.0193	2.2734	2.5268	1.0873	579	0.1235
Y	612.636	12228	33.9366	514.115	98.5209	96.6308	100.033	0.0353	2.2893	2.5445	0.6878	504	0.0867
Zr	808.602	16129	51.1172	774.39	34.2117	38.905	26.7024	0.1527	8.6284	9.5901	2.5264	744	0.2332
Nb	7.2502	145	0.3136	4.7502	2.5	3.6	3.2	0.0033	0.4787	0.532	0.1376	1846	0.2114
Ce	46.8572	937	1.9002	28.7869	18.0703	19.3012	17.301	0.015	1.0589	1.177	0.2019	1787	0.2008
Mn	140.965	2818	8.5688	129.811	11.1543	11.0004	11.4004	0.045	1.7286	1.9213	0.8404	509	0.1159
Hf	119.797	2395	1.9717	29.8701	89.9273	103.035	76.8195	0.0014	0.2036	0.2262	0.0305	737	0.0663
La	29.8029	596	0.8252	12.5019	17.301	16.6009	17.8011	0.0063	0.4453	0.495	0.0856	1693	0.1641
Nd	18.9012	567	0.5201	7.8786	11.0226	11.3338	10.667	0.007	0.5048	0.5611	0.0935	1985	0.1926
O									35.9472	39.954	60.008
Total									89.9715	100	100
Formula	Oxide
Na2O	9.7076
Al2O3	0.253
SiO2	48.0203
Cl	0.3462
K2O	1.0269
CaO	7.4987
TiO2	0.1235
FeO	2.9247
Y2O3	2.9073
ZrO2	11.6552
Nb2O5	0.6847
Ce2O3	1.2403
MnO	2.232
HfO2	0.2401
La2O3	0.5223
Nd2O3	0.5888
Total	89.9715
	52 / 1 . X = -13265. Y = -4941. Z = 23.
Na	1672.99	16638	107.51	1618.05	54.9331	59.6117	52.0089	0.7666	7.3605	8.0718	8.4655	544	0.2986
Al	144.869	2896	5.04	75.8534	69.0159	74.7184	61.4125	0.0021	0.1235	0.1354	0.121	154	0.016
Si	7858.44	76598	517.835	7793.53	64.9148	81.0217	48.8079	0.9139	22.5941	24.7775	21.2712	377	0.2961
Cl	51.7588	1035	3.067	46.1587	5.6001	5.4001	5.8001	0.0808	0.3427	0.3758	0.2556	202	0.0413
K	241.392	2412	14.6597	220.631	20.7614	18.6011	23.4018	0.0577	0.7529	0.8257	0.5092	252	0.0524
Ca	489.489	4887	31.7464	477.789	11.7005	12.2005	11.2004	0.1556	5.385	5.9054	3.5525	626	0.2502
Ti	84.8237	1696	1.906	28.6864	56.1374	64.9139	46.107	0.0019	0.0672	0.0736	0.0371	200	0.0187
Fe	204.188	4081	12.4801	187.828	16.3597	18.9012	14.1007	0.0194	2.2857	2.5065	1.0822	563	0.1235
Y	597.928	11935	33.753	507.99	89.9378	86.3246	92.8284	0.0351	2.2771	2.4971	0.6772	485	0.0859
Zr	804.681	16051	51.0972	769.023	35.6581	40.0053	28.7027	0.1527	8.6211	9.4542	2.4989	764	0.2341
Nb	8.8003	176	0.4186	6.3003	2.5	3.8	2.5	0.0044	0.6388	0.7006	0.1818	1857	0.2292
Ce	49.9082	998	2.1671	32.6149	17.2933	16.0008	18.1011	0.0171	1.2058	1.3223	0.2275	1757	0.2058
Mn	147.272	2944	8.9236	134.302	12.9698	15.2008	9.4003	0.0469	1.7976	1.9713	0.8652	551	0.1197
Hf	125.502	2509	2.5998	39.127	86.3749	95.9304	76.8195	0.0019	0.269	0.295	0.0398	729	0.0673
La	29.8029	596	0.958	14.4188	15.3841	17.601	13.8006	0.0073	0.5162	0.566	0.0983	1605	0.1616
Nd	20.5681	617	0.665	10.0077	10.5604	10.467	10.667	0.0089	0.6445	0.7068	0.1181	1953	0.1978
O									36.3065	39.8149	59.9989
Total									91.1882	100	100
Formula	Oxide
Na2O	9.9218
Al2O3	0.2333
SiO2	48.3372
Cl	0.3427
K2O	0.907
CaO	7.5348
TiO2	0.112
FeO	2.9405
Y2O3	2.8917
ZrO2	11.6454
Nb2O5	0.9139
Ce2O3	1.4123
MnO	2.3212
HfO2	0.3172
La2O3	0.6053
Nd2O3	0.7518
Total	91.1882
	53 / 1 . X = -11552. Y = -4406. Z = 30.
Na	2207.26	21913	141.48	2143.32	63.9367	70.2163	60.0119	1.0088	9.5916	10.3502	10.8133	578	0.371
Al	146.07	2920	5.1807	78.4838	67.5865	70.7165	63.4133	0.0021	0.1286	0.1387	0.1235	154	0.0161
Si	7681.82	74919	502.868	7618.11	63.7139	76.4193	51.0086	0.8874	22.1302	23.8805	20.4224	374	0.2923
Cl	67.365	1347	3.9847	60.3648	7.0002	7.2002	6.8002	0.105	0.4453	0.4806	0.3256	224	0.0479
K	128.454	1284	7.2718	110.163	18.2911	20.0013	16.2009	0.0286	0.3737	0.4032	0.2477	235	0.039
Ca	466.517	4658	29.9893	454.317	12.2005	10.8004	13.6006	0.147	5.0813	5.4832	3.2859	634	0.2421
Ti	81.622	1632	1.6061	24.3309	57.2911	65.4141	48.0076	0.0016	0.0565	0.061	0.0306	201	0.0184
Fe	222.914	4455	13.5266	204.919	17.9952	19.0012	17.101	0.0211	2.4764	2.6722	1.1493	586	0.1284
Y	576.394	11506	31.862	482.688	93.7068	88.4258	97.9316	0.0331	2.151	2.3211	0.6271	492	0.0838
Zr	837.709	16708	53.0681	803.944	33.7654	37.3046	28.1026	0.1586	8.9571	9.6655	2.545	739	0.2378
Nb	7.1502	143	0.307	4.6502	2.5	4.9001	2.6	0.0032	0.4682	0.5052	0.1306	1844	0.2101
Ce	49.6081	992	2.0087	30.43	19.1781	20.1013	18.6011	0.0159	1.1163	1.2046	0.2065	1836	0.2062
Mn	146.921	2937	8.9462	135.529	11.3927	10.2003	13.3006	0.047	1.8011	1.9435	0.8497	513	0.1183
Hf	132.058	2640	3.0584	46.3329	85.7247	97.2312	74.2182	0.0022	0.3197	0.345	0.0464	729	0.0686
La	31.4533	629	0.9562	14.4857	16.9676	17.9011	16.3009	0.0073	0.5145	0.5552	0.096	1672	0.166
Nd	20.9681	629	0.6674	10.11	10.8582	10.7337	11.0004	0.009	0.6465	0.6976	0.1162	1967	0.1986
O									36.4126	39.2926	58.9844
Total									92.6705	100	100
Formula	Oxide
Na2O	12.9293
Al2O3	0.2429
SiO2	47.3448
Cl	0.4453
K2O	0.4501
CaO	7.1097
TiO2	0.0943
FeO	3.1858
Y2O3	2.7316
ZrO2	12.0992
Nb2O5	0.6698
Ce2O3	1.3075
MnO	2.3256
HfO2	0.3771
La2O3	0.6034
Nd2O3	0.7541
Total	92.6705
	54 / 1 . X = -10287. Y = -4250. Z = 33.
Na	2314.54	22970	148.381	2247.87	66.6762	70.6165	64.2136	1.058	10.0053	10.6913	11.1298	587	0.3843
Al	178.155	3561	7.3703	111.654	66.5005	73.3177	57.4109	0.003	0.183	0.1955	0.1734	152	0.0172
Si	7797.93	76023	510.599	7735.22	62.7142	82.2223	43.2062	0.9011	22.4749	24.0158	20.4649	371	0.2952
Cl	59.8618	1197	3.4696	52.5617	7.3002	7.5002	7.1002	0.0914	0.3885	0.4151	0.2802	229	0.0448
K	126.353	1263	7.0691	107.091	19.2612	19.8013	18.6011	0.0278	0.3637	0.3886	0.2379	241	0.0389
Ca	445.554	4449	28.7772	435.954	9.6003	11.4004	7.8002	0.141	4.8802	5.2148	3.1139	564	0.236
Ti	84.4735	1689	1.848	27.9963	56.4773	61.6125	50.6085	0.0018	0.0651	0.0695	0.0347	199	0.0185
Fe	218.808	4373	13.4237	203.36	15.4479	17.301	13.8006	0.0209	2.4592	2.6278	1.1261	543	0.1267
Y	572.379	11426	31.6719	479.806	92.5727	91.1274	93.729	0.0329	2.1418	2.2886	0.6161	490	0.0836
Zr	875.422	17458	55.434	839.787	35.6351	40.9055	27.2024	0.1656	9.3707	10.0132	2.6271	760	0.2443
Nb	4.7501	95	0.1485	2.2501	2.5	3.6	2.3	0.0016	0.2268	0.2424	0.0624	1847	0.1822
Ce	50.1583	1003	2.0587	31.1879	18.9704	21.0015	17.701	0.0163	1.1449	1.2234	0.209	1827	0.207
Mn	131.207	2623	7.7403	117.26	13.9468	14.6007	12.9006	0.0407	1.5591	1.666	0.7258	568	0.1123
Hf	125.952	2518	2.8106	42.5786	83.3737	98.9323	67.8152	0.002	0.2941	0.3143	0.0421	719	0.0673
La	28.6027	572	0.8588	13.0102	15.5925	16.0008	15.3008	0.0066	0.4624	0.4941	0.0851	1604	0.1587
Nd	20.6681	620	0.7039	10.6633	10.0048	9.6003	10.467	0.0095	0.6823	0.7291	0.121	1889	0.1952
O									36.8817	39.4104	58.9504
Total									93.5836	100	100
Formula	Oxide
Na2O	13.4869
Al2O3	0.3458
SiO2	48.0821
Cl	0.3885
K2O	0.4381
CaO	6.8284
TiO2	0.1085
FeO	3.1637
Y2O3	2.7199
ZrO2	12.6579
Nb2O5	0.3245
Ce2O3	1.341
MnO	2.0132
HfO2	0.3468
La2O3	0.5423
[truncated: 3,961 more rows]
